# Supplementary material
Source: PubMed Central journal article supplement (PMC8788145)
Supplement: NIHMS1770155-supplement-Suppl_1.pdf [file NIHMS1770155-supplement-Suppl_1.pdf]

**Potent, Selective, Allosteric Inhibition of Human Plasmin by Sulfated Non-Saccharide  
Glycosaminoglycan Mimetics**

Daniel K. Afosah,<sup>#</sup> Rami A. Al-Horani,<sup>#</sup> Nehru Viji Sankaranarayanan and Umesh R. Desai\*

*Department of Medicinal Chemistry & Institute for Structural Biology, Drug Discovery and  
Development  
Virginia Commonwealth University*

**Supplementary Information**

|     | <b>Section</b>                                                                                                                        | <b>Page<br/>#</b> |
|-----|---------------------------------------------------------------------------------------------------------------------------------------|-------------------|
| 1)  | Table S1. Thermodynamics ( $K_D$ and $\Delta F_{MAX}$ ) of NSGMs (UFH) – Plasmin Interaction                                          | S2                |
| 2)  | Table S2. Salt-Dependence of Plasmin Inhibition by NSGM <b>2</b>                                                                      | S2                |
| 3)  | Figure S1. Spectrofluorometric Measurement of the Affinity of Active-Site-Blocked Human Plasmin for Inhibitors <b>2</b> and <b>13</b> | S3                |
| 4)  | Spectral profiles for NSGM <b>2</b>                                                                                                   | S4                |
| 5)  | Spectral profile for NSGM <b>3</b>                                                                                                    | S6                |
| 6)  | Spectral profile for NSGM <b>4</b>                                                                                                    | S8                |
| 7)  | Spectral profile for NSGM <b>5</b>                                                                                                    | S10               |
| 8)  | Spectral profile for NSGM <b>6</b>                                                                                                    | S12               |
| 9)  | Spectral profile for NSGM <b>7</b>                                                                                                    | S14               |
| 10) | Spectral profile for NSGM <b>8</b>                                                                                                    | S16               |
| 11) | Spectral profile for NSGM <b>9</b>                                                                                                    | S18               |
| 12) | Spectral profile for NSGM <b>10</b>                                                                                                   | S20               |
| 13) | Spectral profile for NSGM <b>11</b>                                                                                                   | S22               |
| 14) | Spectral profile for NSGM <b>12</b>                                                                                                   | S24               |
| 15) | Spectral profile for NSGM <b>13</b>                                                                                                   | S26               |
| 16) | Spectral profile for NSGM <b>14</b>                                                                                                   | S28               |
| 17) | Spectral profile for NSGM <b>15</b>                                                                                                   | S30               |
| 18) | Spectral profile for NSGM <b>16</b>                                                                                                   | S32               |
| 19) | PAINs Statement                                                                                                                       | S33               |

**Table S1.** Dissociation Equilibrium Constants ( $K_D$ ) and Maximal Fluorescence Change ( $\Delta F_{MAX}$ ) for the Interactions of NSGMs and UFH with Human Plasmin.<sup>a</sup>

| <i>Inhibitor</i> | $K_D$ ( $\mu M$ ) | $\Delta F_{MAX}$ (%) |
|------------------|-------------------|----------------------|
| <b>2</b>         | $0.7 \pm 0.1^b$   | $-112 \pm 3$         |
| <b>4</b>         | $1.0 \pm 0.1$     | $-90 \pm 2$          |
| <b>10</b>        | $3.6 \pm 0.6$     | $-101 \pm 7$         |
| <b>13</b>        | $1.9 \pm 0.2$     | $-108 \pm 3$         |
| <b>UFH</b>       | $6.7 \pm 0.8$     | $-97 \pm 7$          |

<sup>a</sup> Measured using the intrinsic tryptophan fluorescence change in pH 7.4 buffer at 37 °C. See Experimental Part for details.

<sup>b</sup> Errors represent standard error calculated using global fit of the data.

**Table S2.** Salt-Dependence of Plasmin Inhibition by NSGM 2.<sup>a</sup>

| <i>[NaCl]</i> (mM) | $IC_{50}$ ( $\mu M$ ) | <i>HS</i>     | $\Delta Y$ (%) |
|--------------------|-----------------------|---------------|----------------|
| <b>0</b>           | $2.8 \pm 0.3^b$       | $1.0 \pm 0.3$ | $90 \pm 7$     |
| <b>100</b>         | $6.3 \pm 0.4$         | $0.7 \pm 0.1$ | $93 \pm 4$     |
| <b>200</b>         | $17.1 \pm 2.7$        | $0.8 \pm 0.2$ | $71 \pm 7$     |

<sup>a</sup> The  $IC_{50}$ , *HS*, and  $\Delta Y$  values were obtained following non-linear regression analysis of direct inhibition of human plasmin in appropriate TrisHCl buffers of pH 7.4 at 37 °C. Inhibition was monitored spectro-photometrically. See Experimental Section for details. <sup>b</sup> Errors represent  $\pm 1$  S.E.

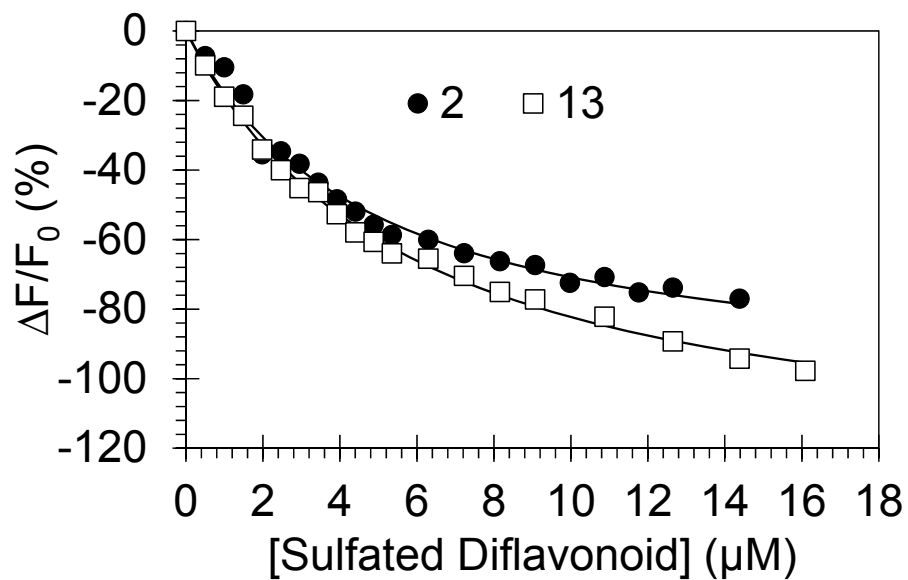

**Figure S1:** Spectrofluorometric measurement of the affinity of inhibitors **2** (●) and **13** (□) for active-site-blocked, dansyl-EGR-cmk- plasmin at pH 7.4 and 37 °C using the intrinsic tryptophan fluorescence ( $\lambda_{EM} = 348$  nm,  $\lambda_{EX} = 280$  nm). Solid lines represent the nonlinear regressional fits using quadratic equation 3.

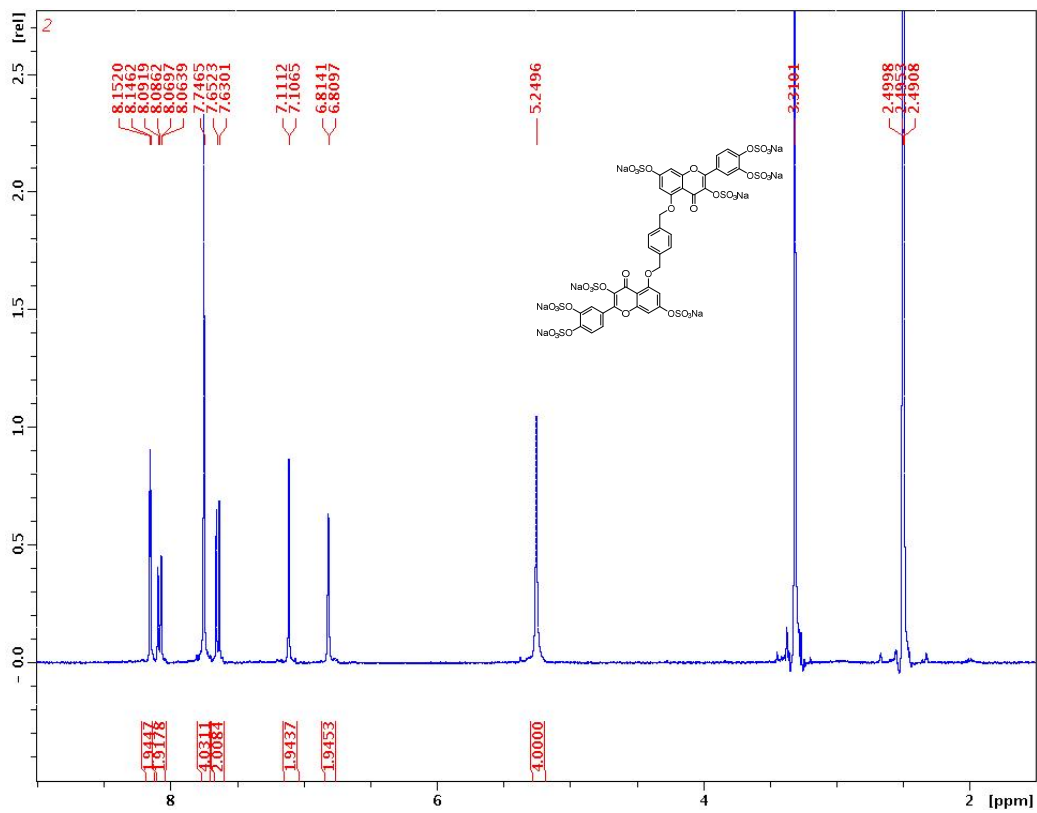

Figure S1a: <sup>1</sup>H NMR (400 MHz, DMSO-d<sub>6</sub>) for NSGM 2

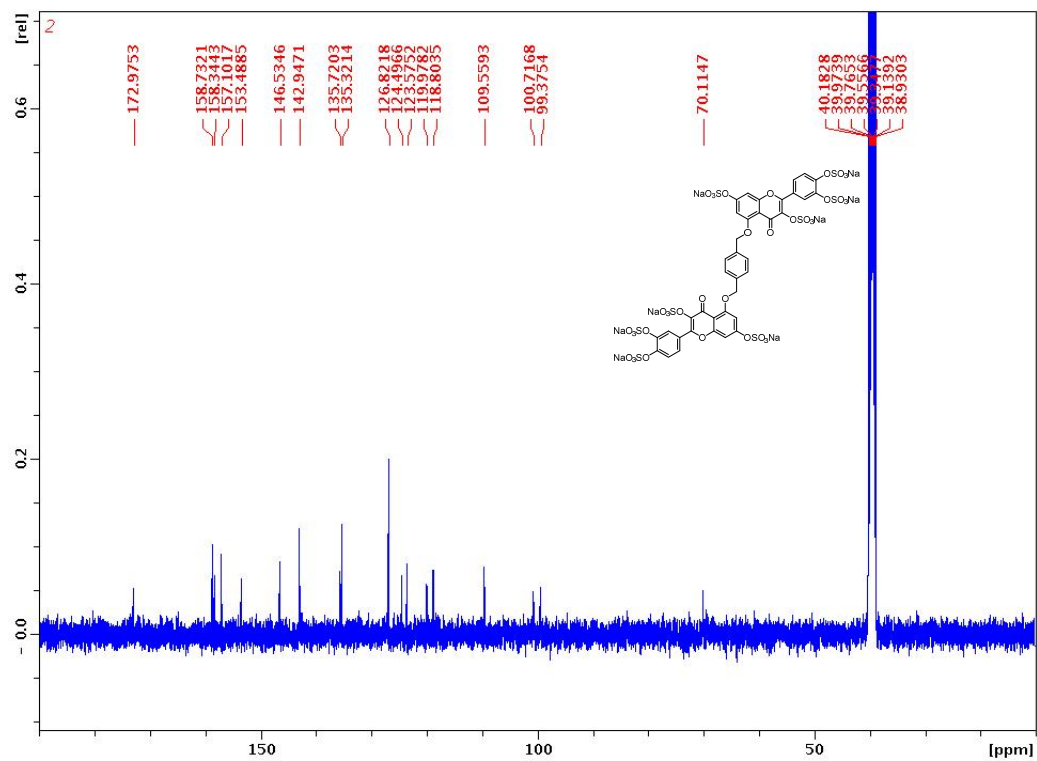

Figure S1b: <sup>13</sup>C NMR (100 MHz, DMSO-d<sub>6</sub>) for NSGM 2

2

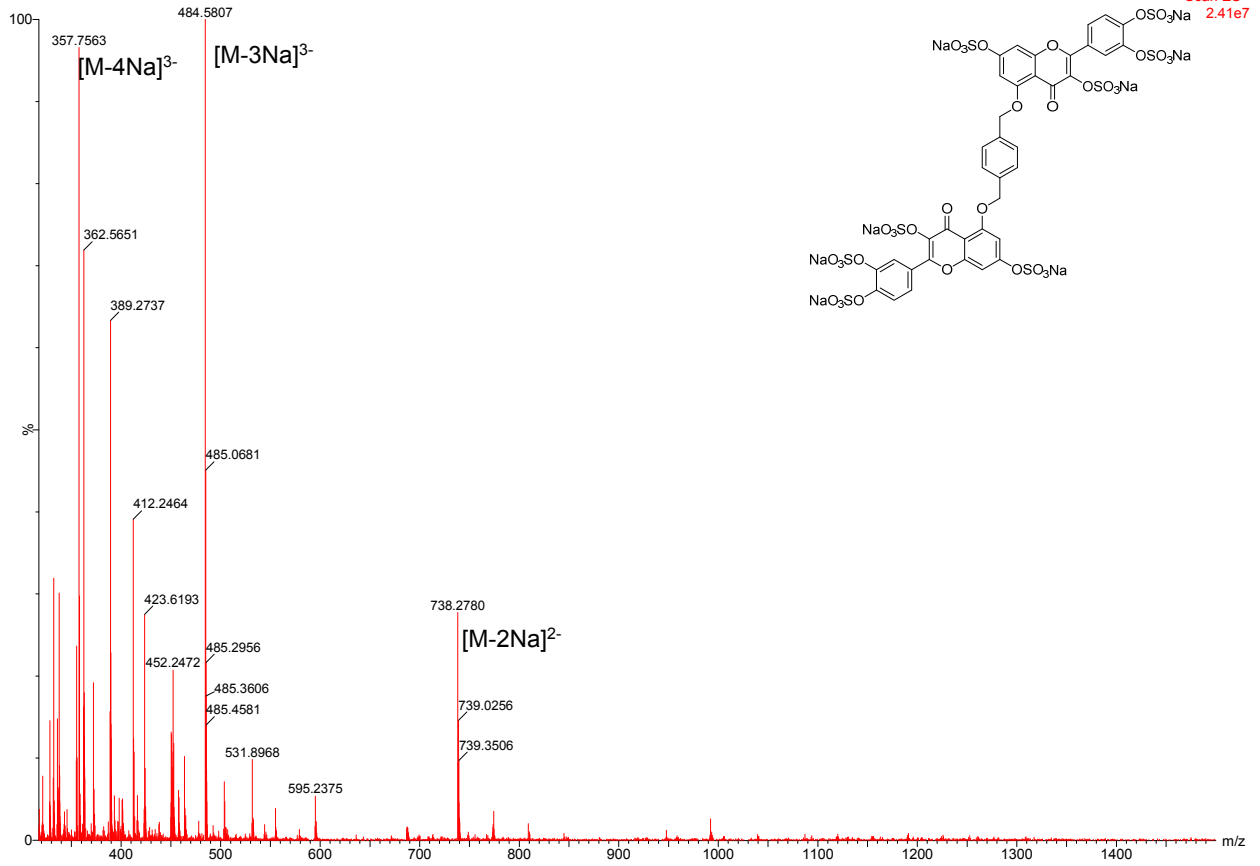

Figure S1c: Mass Spectrum for NSGM 2

DANIEL SAMPLE 0  
DA\_SFD\_2 Sm (Mn, 5x5)

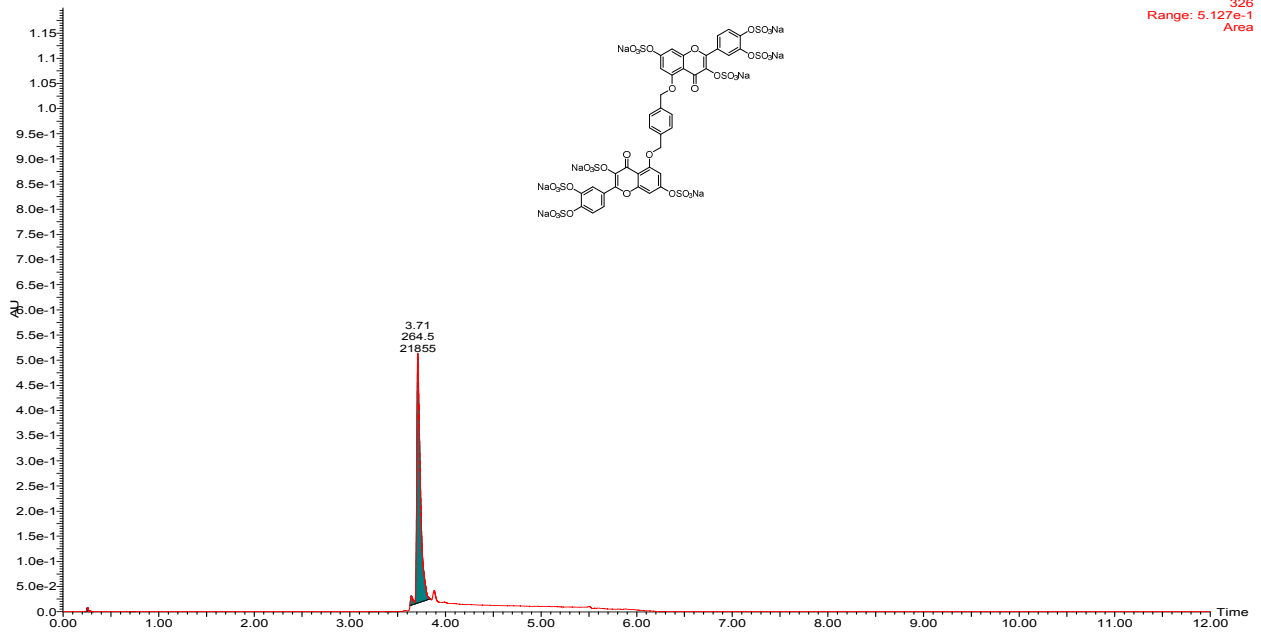

Figure S1d: UPLC profile for NSGM 2

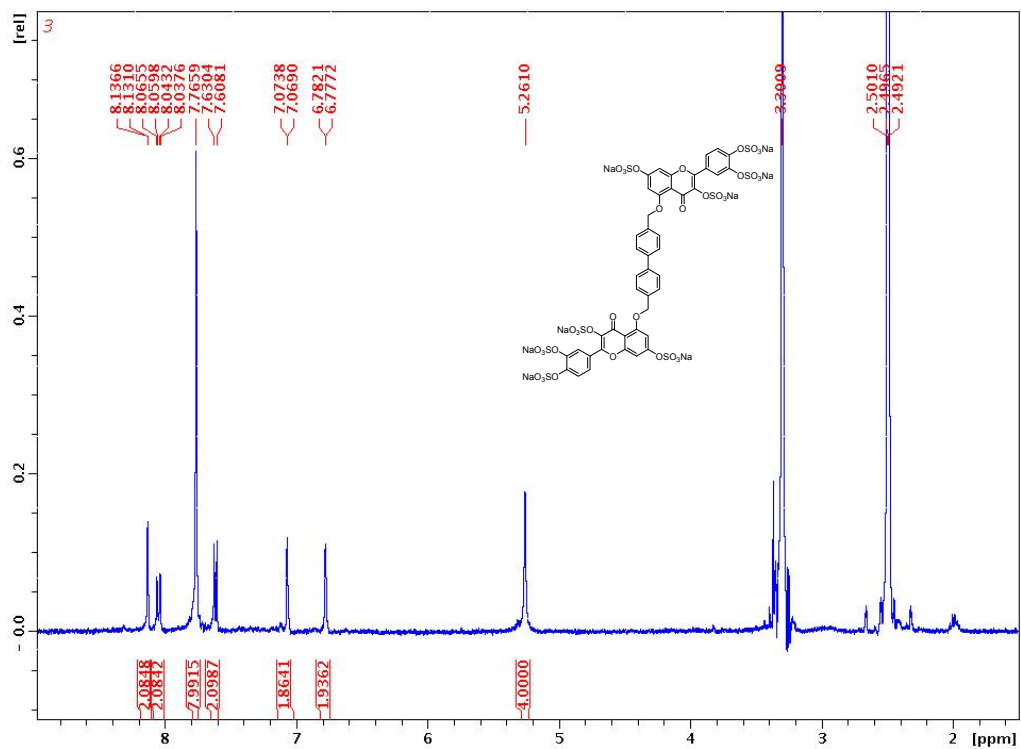

Figure S2a:  $^1\text{H}$  NMR (400 MHz, DMSO- $d_6$ ) for NSGM 3

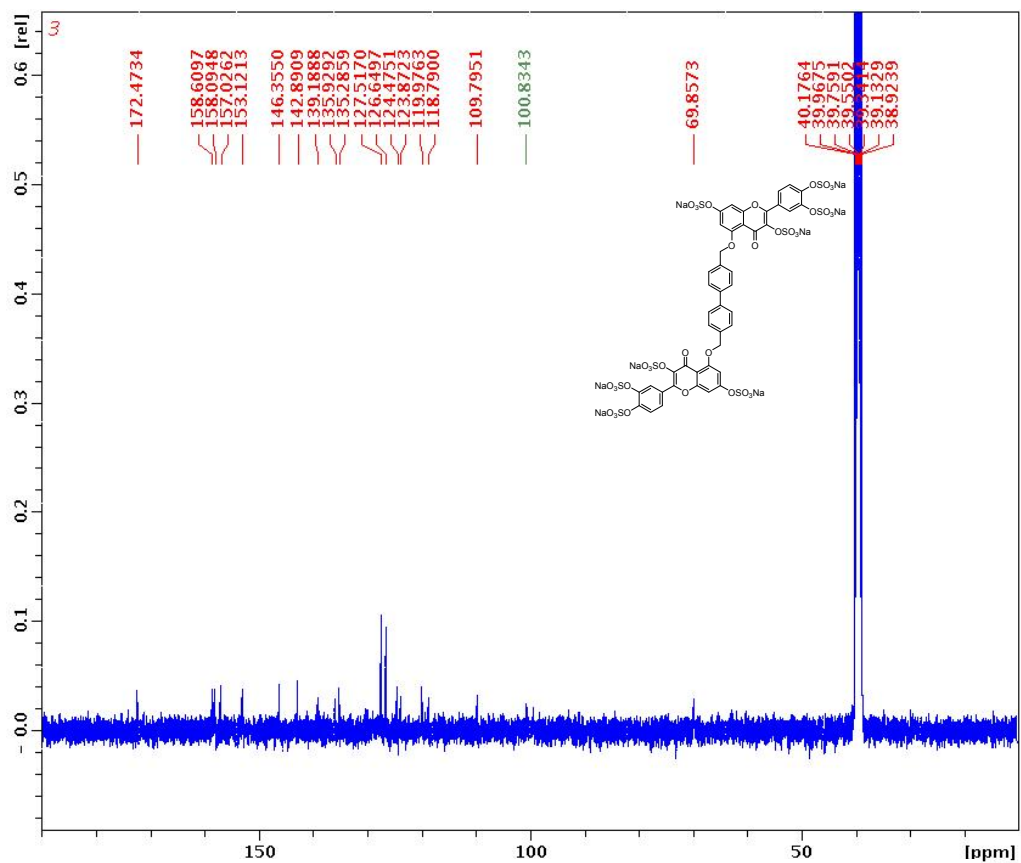

Figure S2b:  $^{13}\text{C}$  NMR (100 MHz, DMSO- $d_6$ ) for NSGM 3

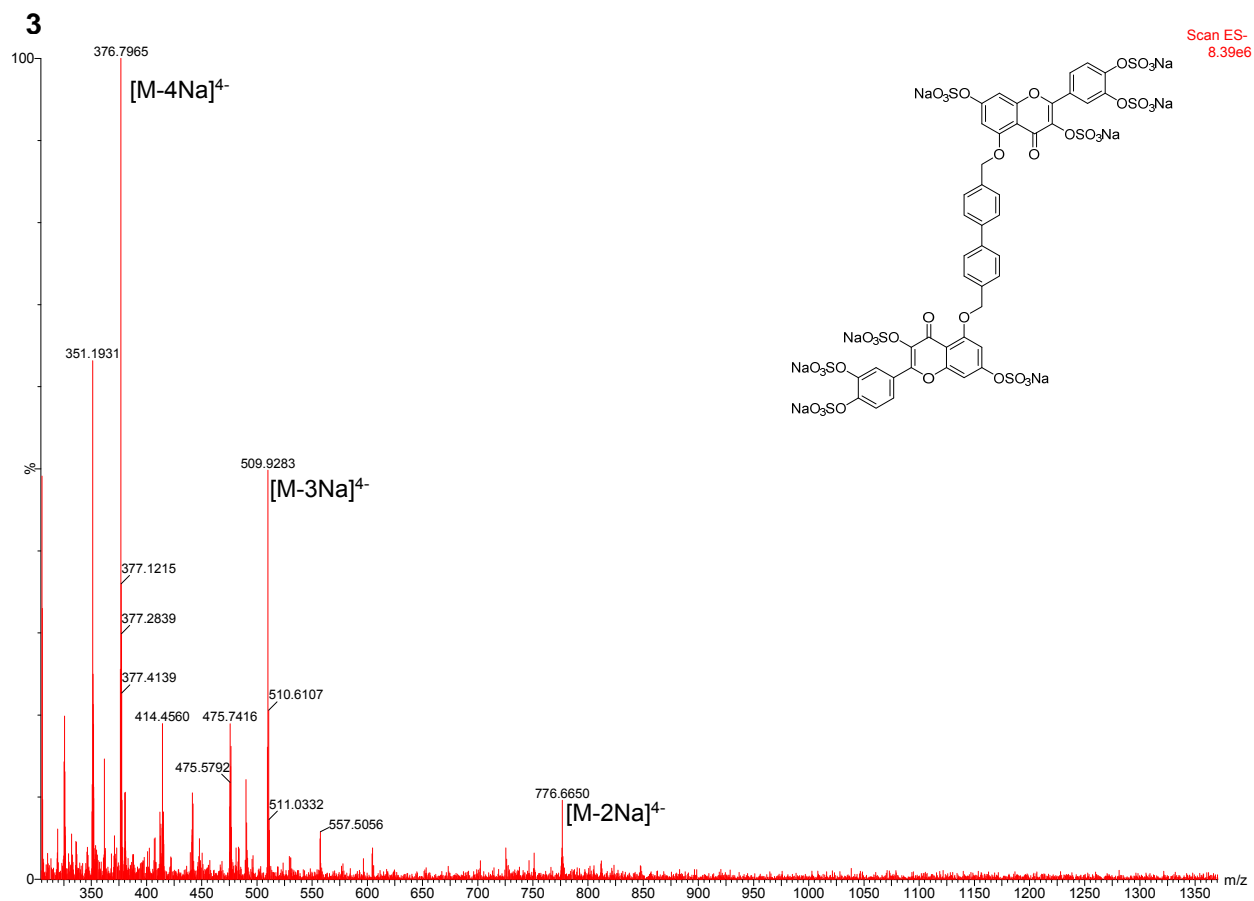

**Figure S2c: Mass Spectrum for NSGM 3**

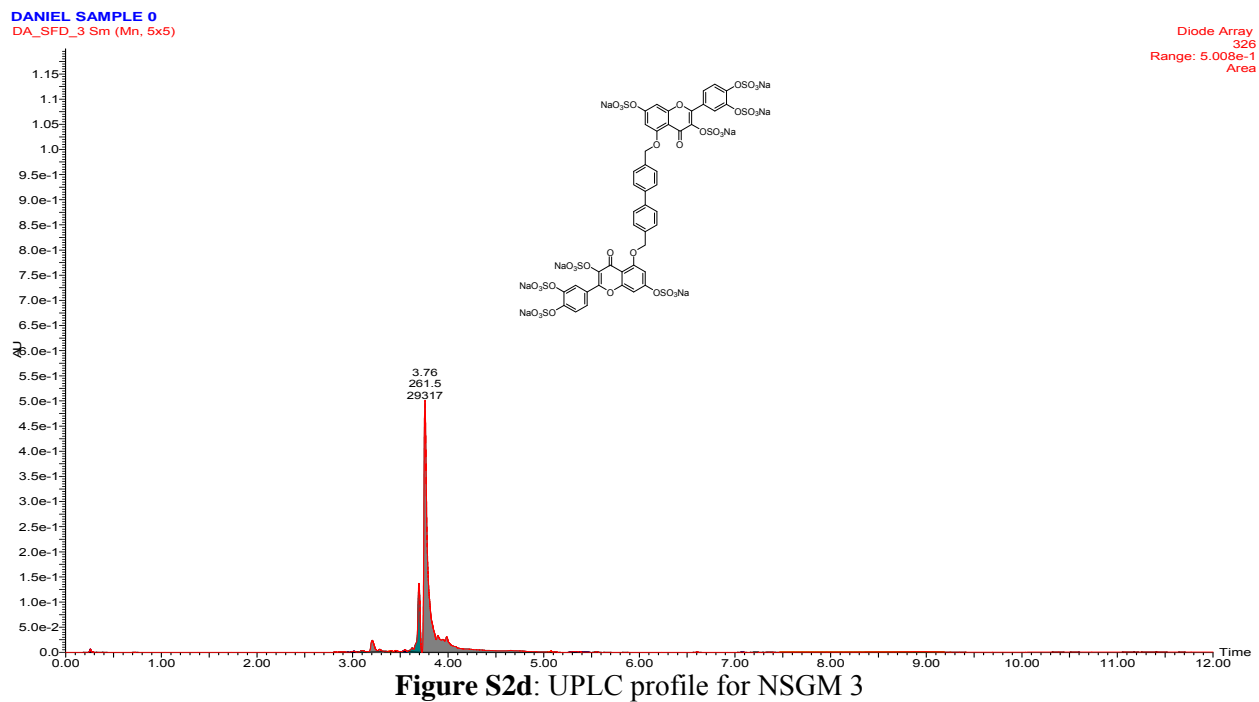

**Figure S2d: UPLC profile for NSGM 3**





4

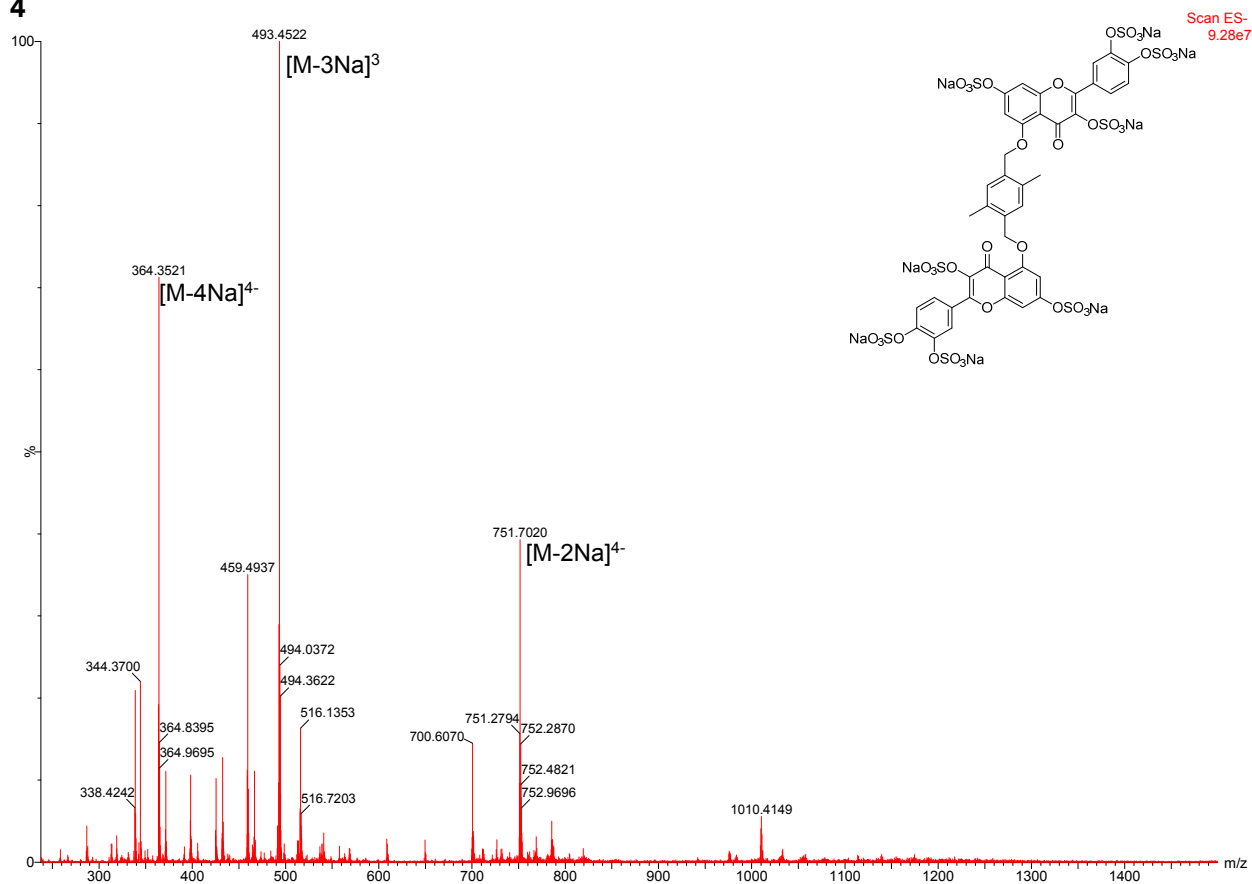

Figure S3c: Mass Spectrum for NSGM 4

DANIEL SAMPLE 0  
DA\_SFD\_4 Sm (Mn, 5x5)

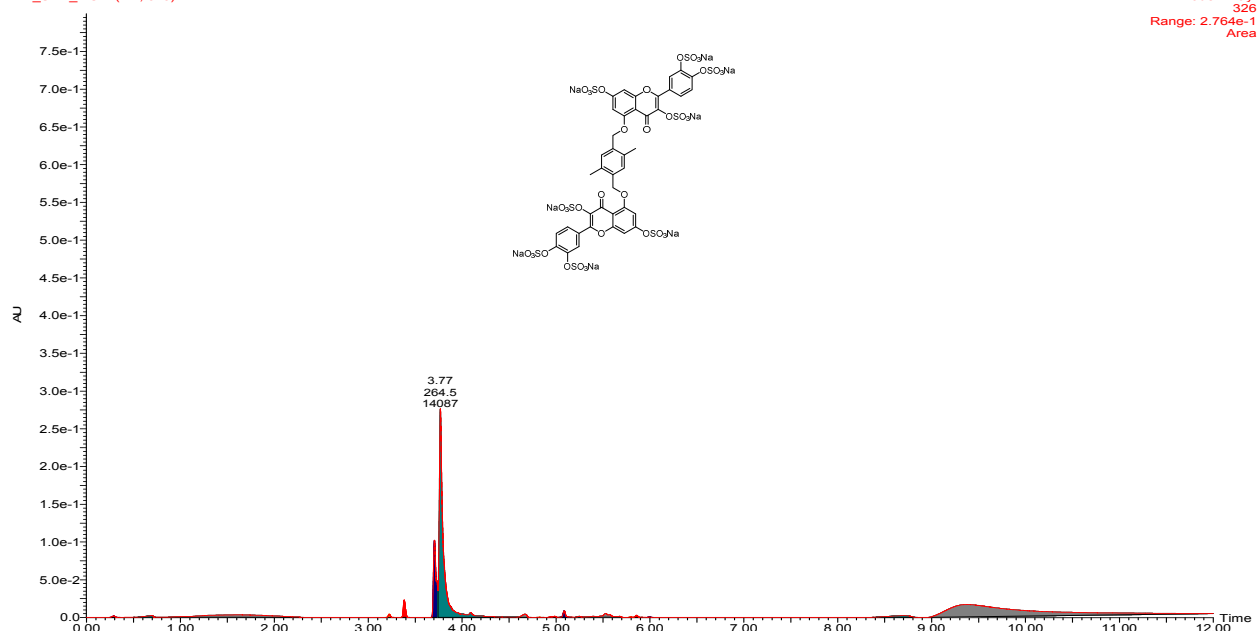

Figure S3d: UPLC profile for NSGM 4

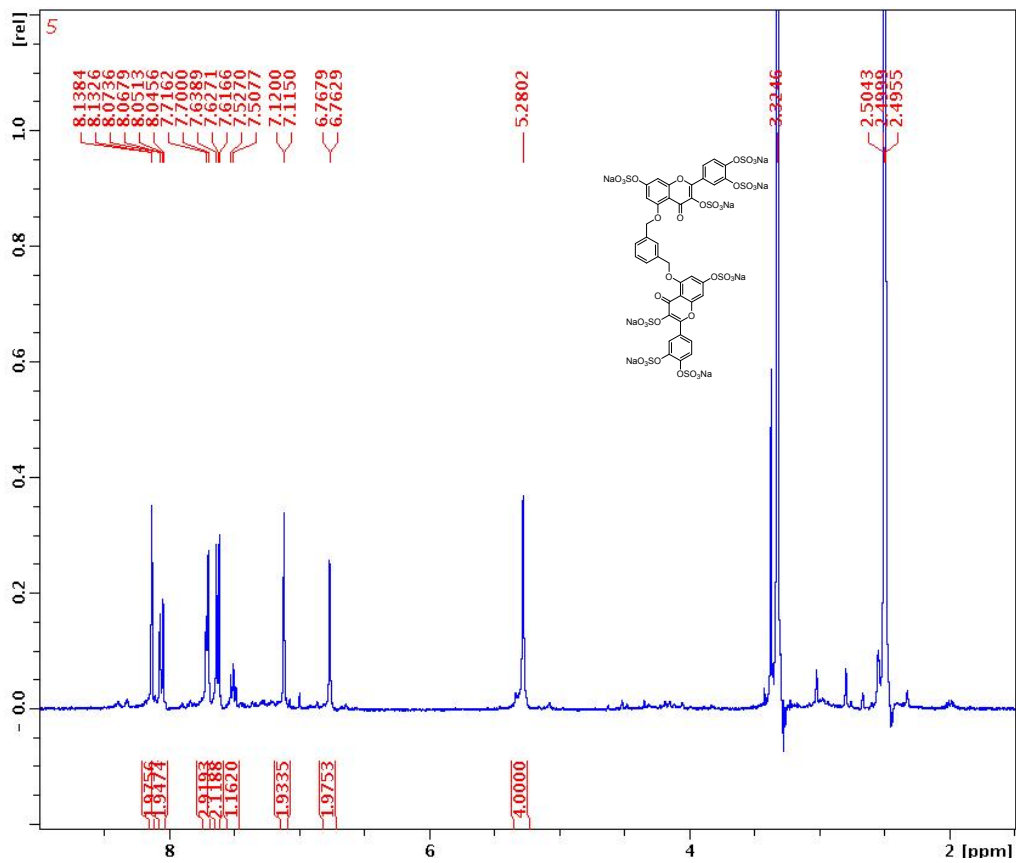

Figure S4a: <sup>1</sup>H NMR (400 MHz, DMSO-d<sub>6</sub>) for NSGM 5

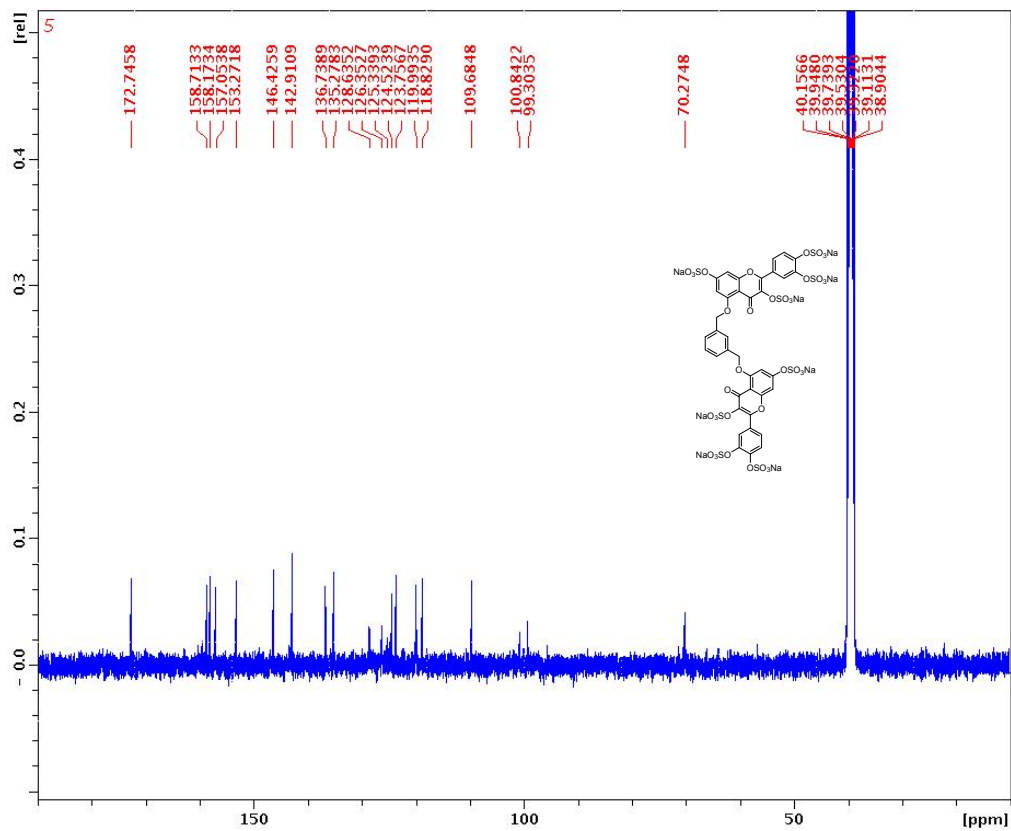

Figure S4b: <sup>13</sup>C NMR (100 MHz, DMSO-d<sub>6</sub>) for NSGM 5



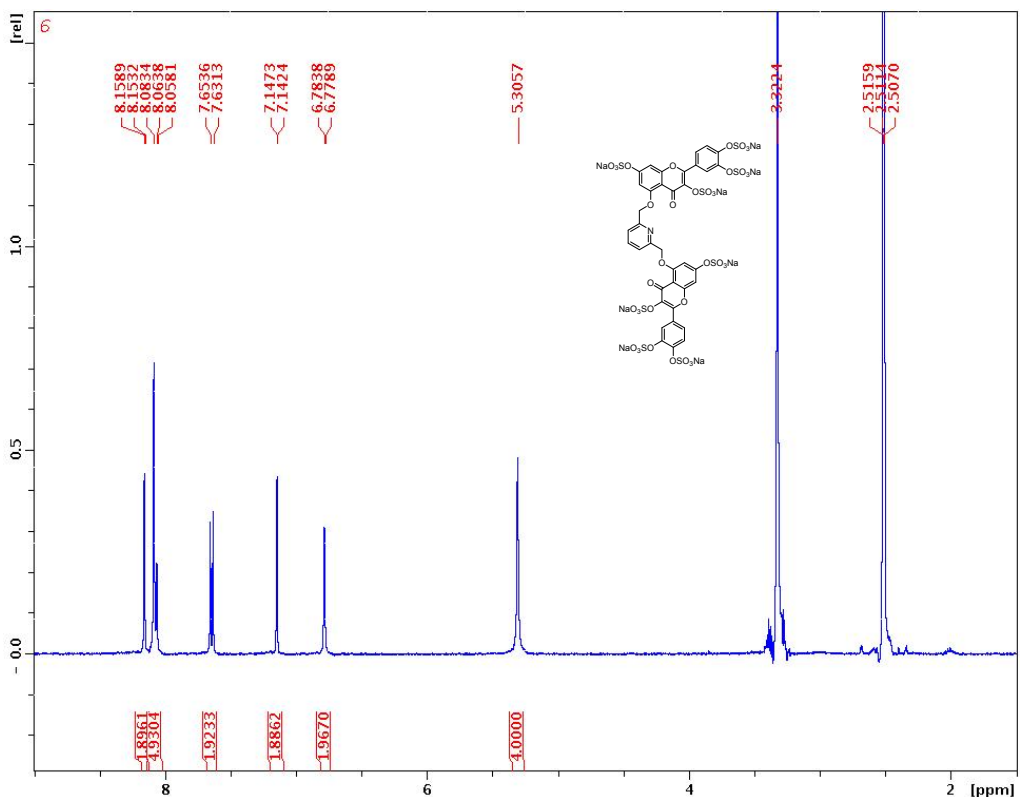

Figure S5a:  $^1\text{H}$  NMR (400 MHz, DMSO-d<sub>6</sub>) for NSGM 6

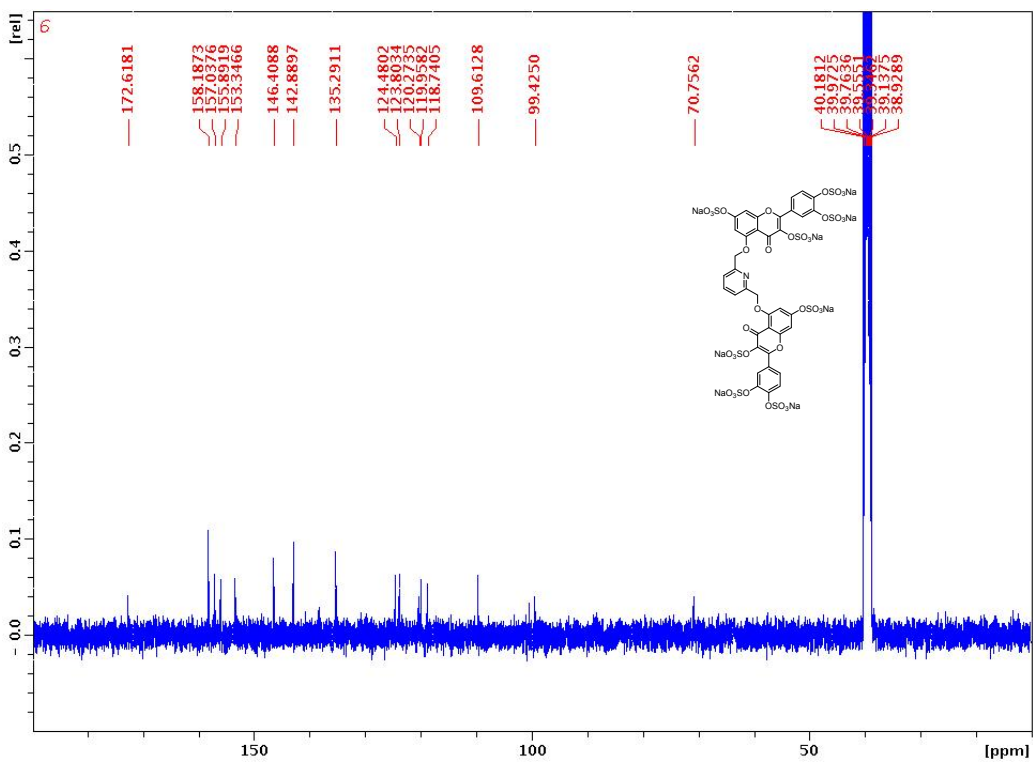

Figure S5b:  $^{13}\text{C}$  NMR (100 MHz, DMSO-d<sub>6</sub>) for NSGM 6



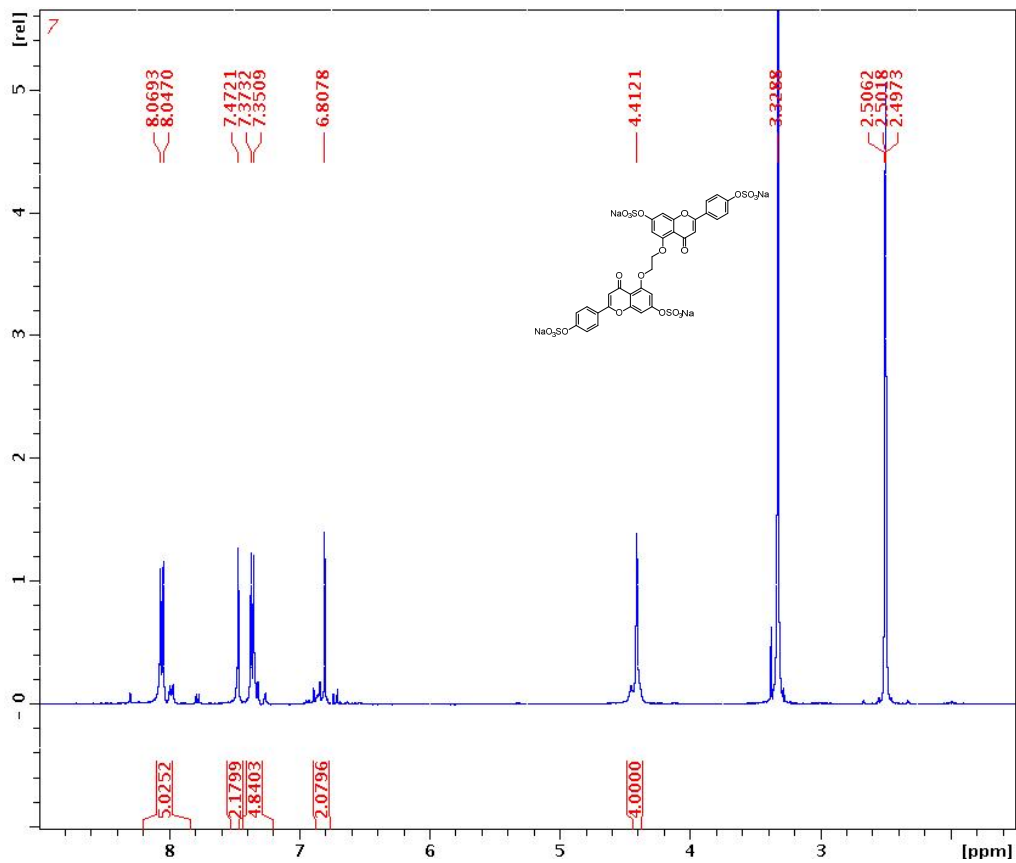

Figure S6a:  $^1\text{H}$  NMR (400 MHz, DMSO- $d_6$ ) for NSGM 7

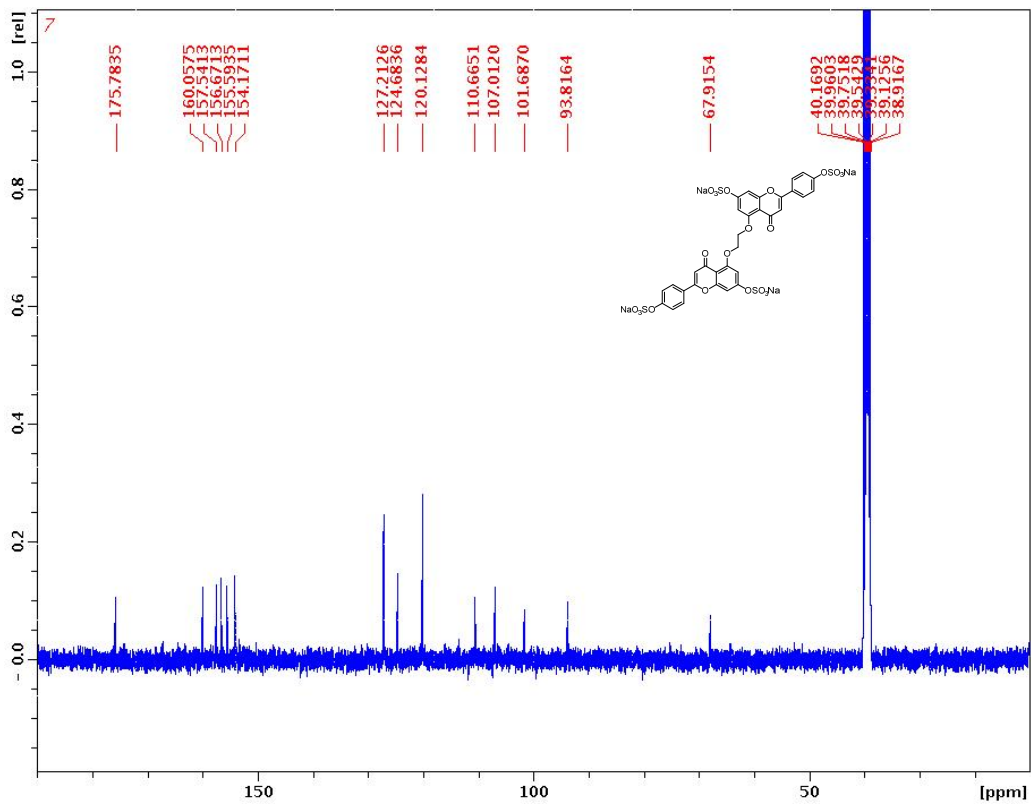

Figure S6b:  $^{13}\text{C}$  NMR (100 MHz, DMSO- $d_6$ ) for NSGM 7

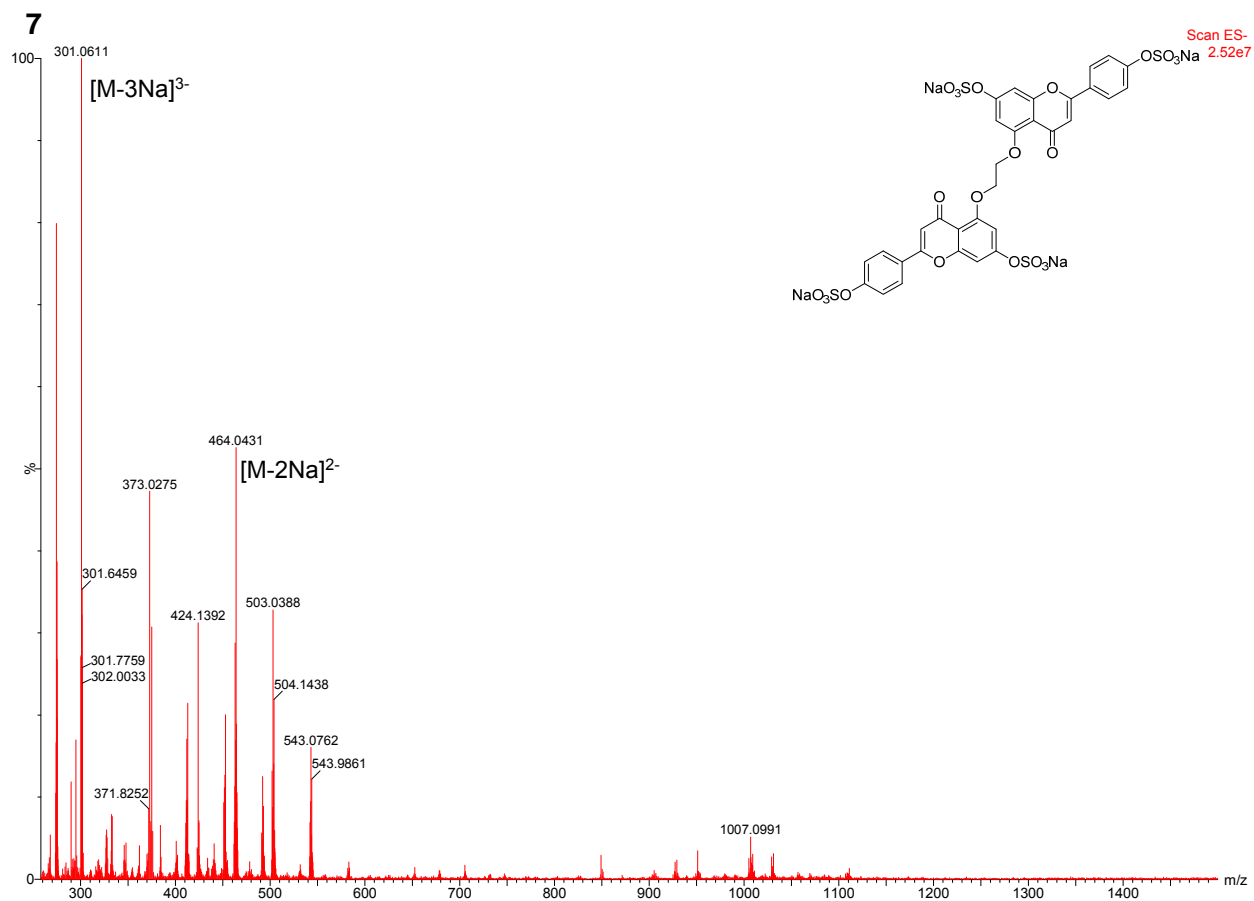

**Figure S6c:** Mass Spectrum for NSGM 7

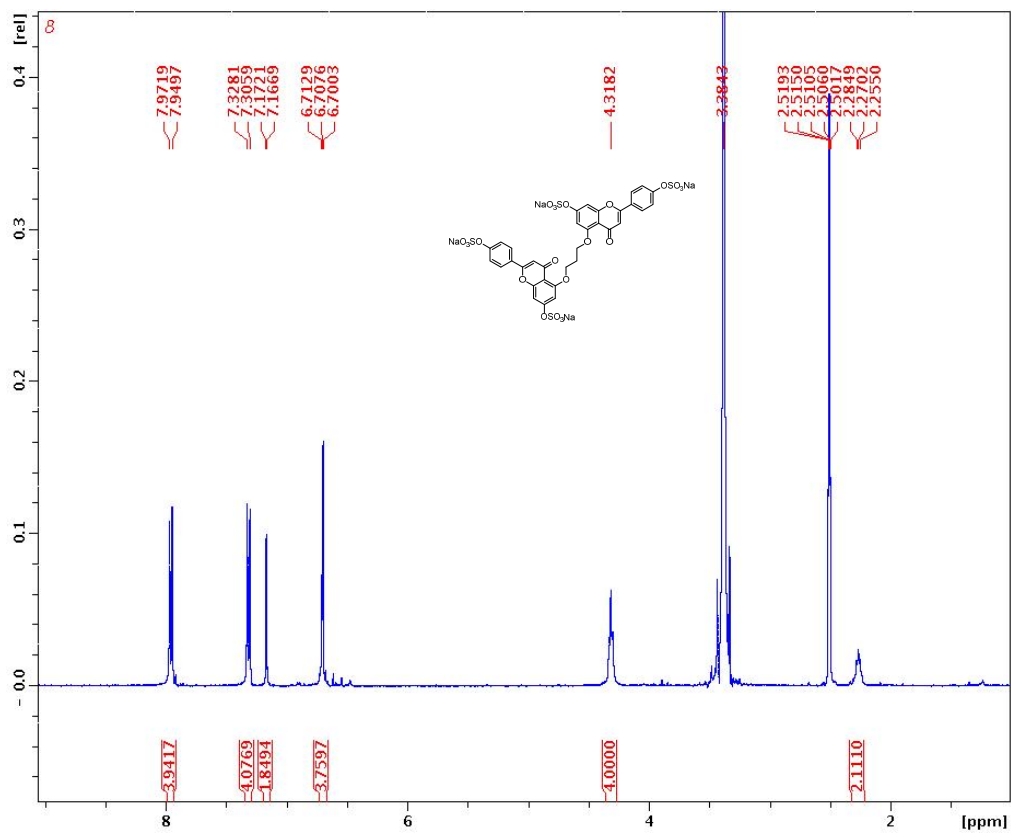

Figure S7a:  $^1\text{H}$  NMR (400 MHz, DMSO- $d_6$ ) for NSGM 8

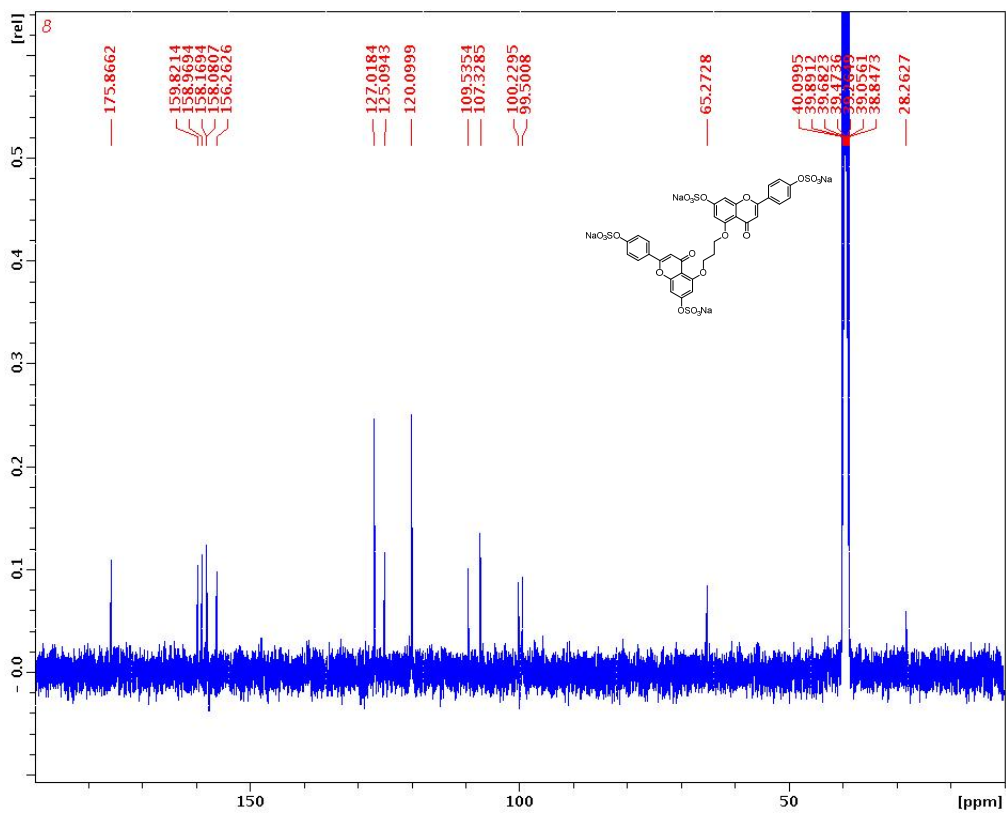

Figure S7b:  $^{13}\text{C}$  NMR (100 MHz, DMSO- $d_6$ ) for NSGM 8



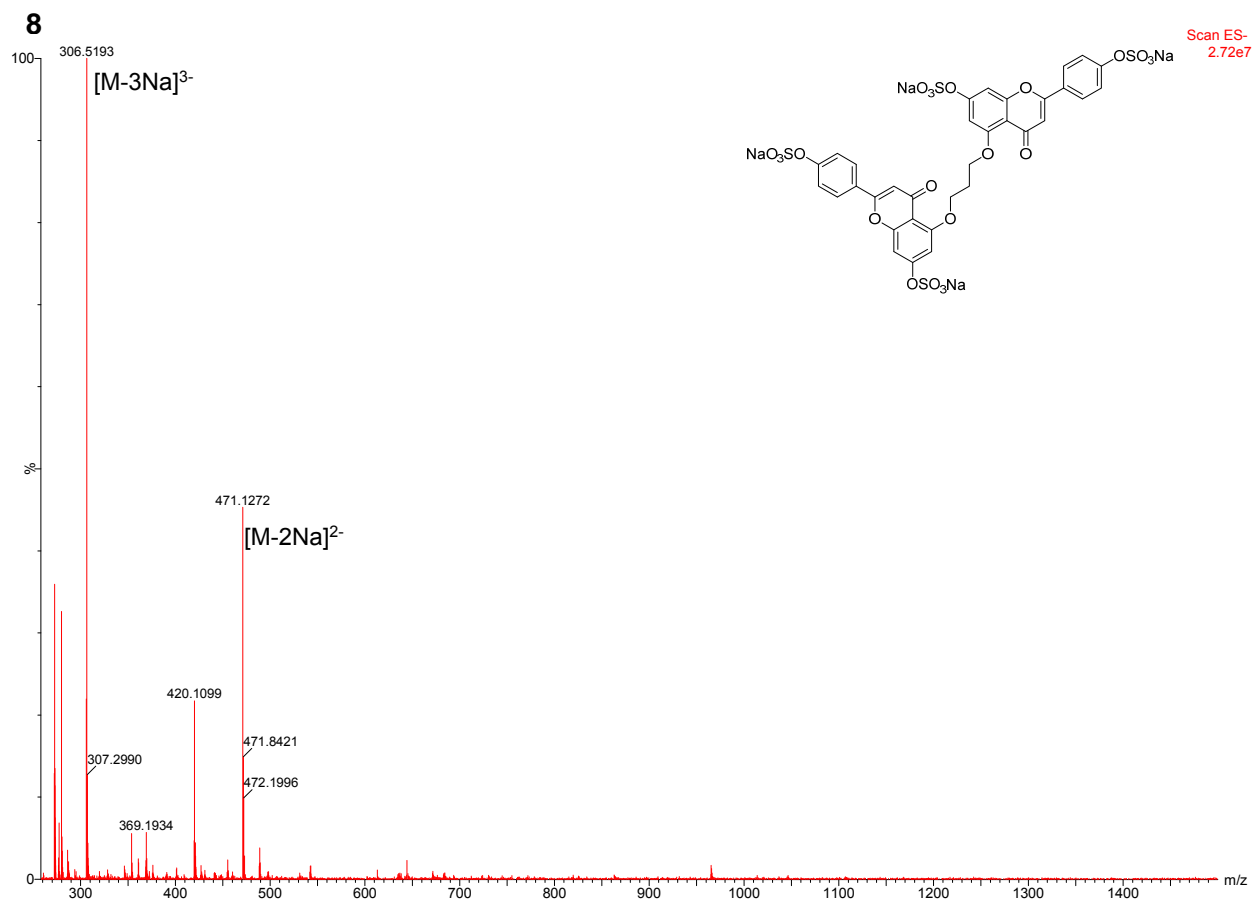

Figure S7c: Mass Spectrum for NSGM 8

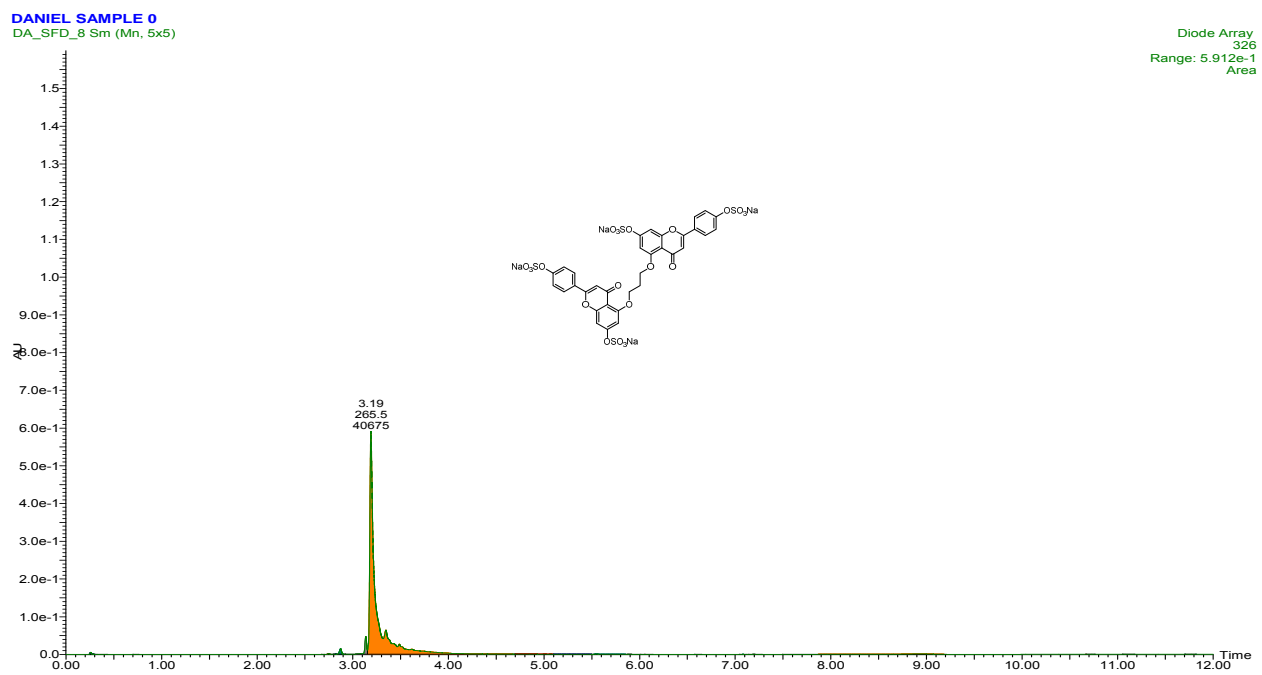

Figure S7d: UPLC profile for NSGM 8

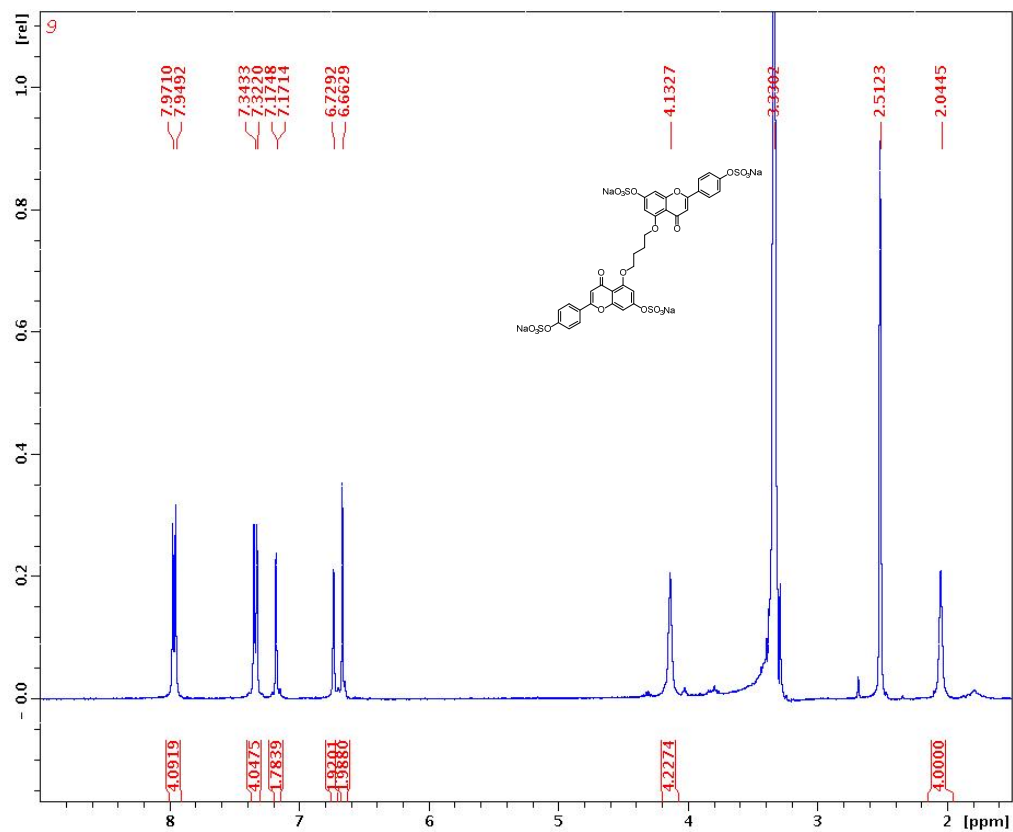

Figure S8a:  $^1\text{H}$  NMR (400 MHz, DMSO- $d_6$ ) for NSGM 9

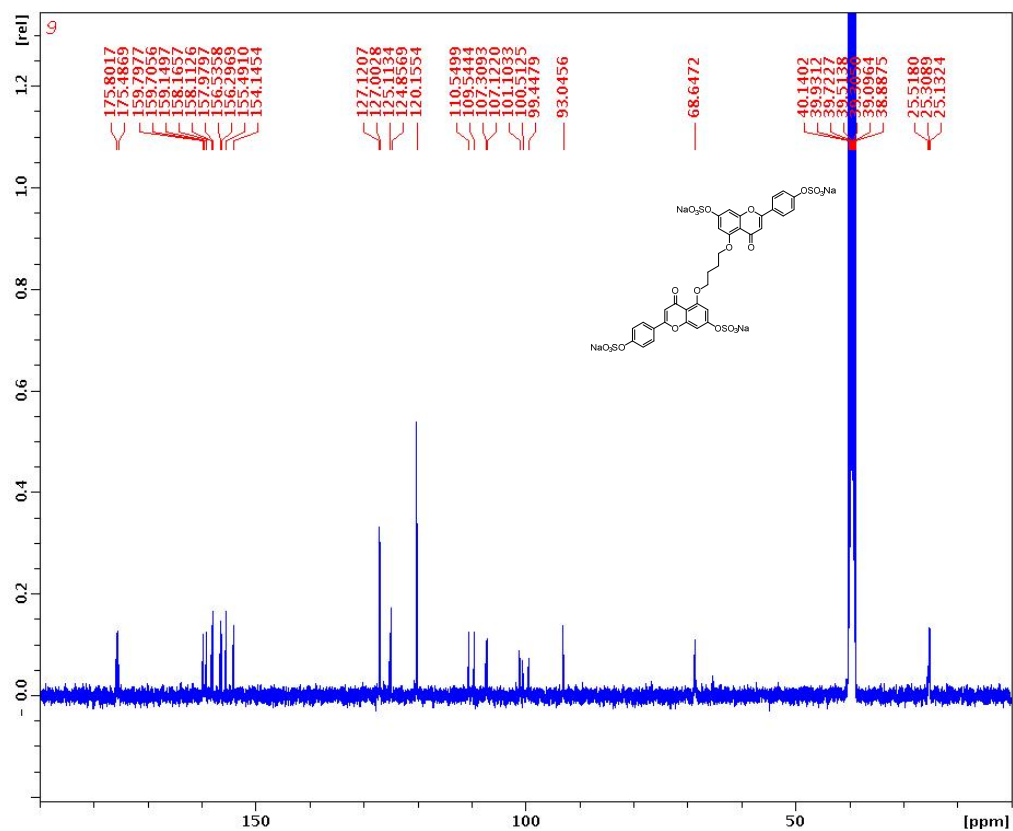

Figure S8b:  $^{13}\text{C}$  NMR (100 MHz, DMSO- $d_6$ ) for NSGM 9

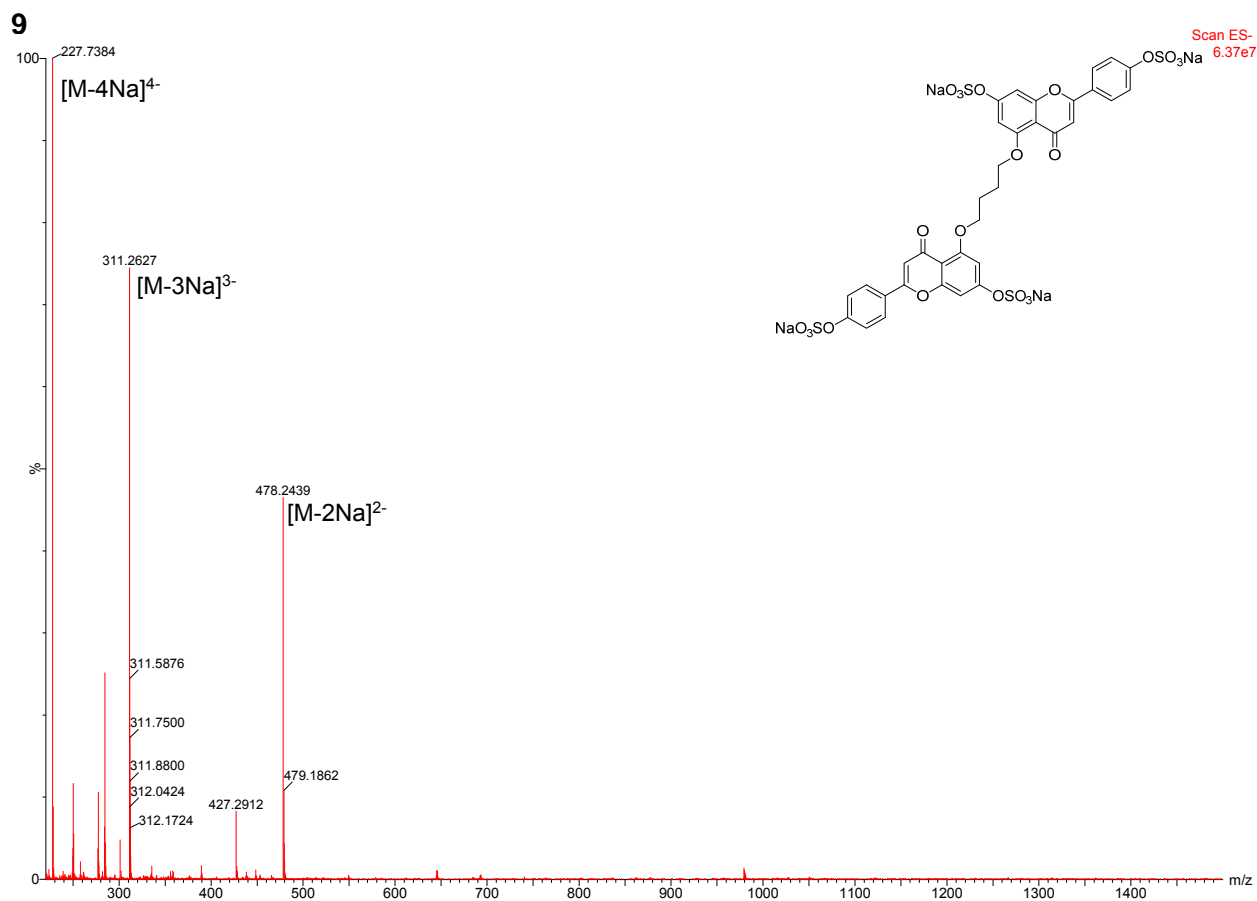

**Figure S8c: Mass Spectrum for NSGM 9**

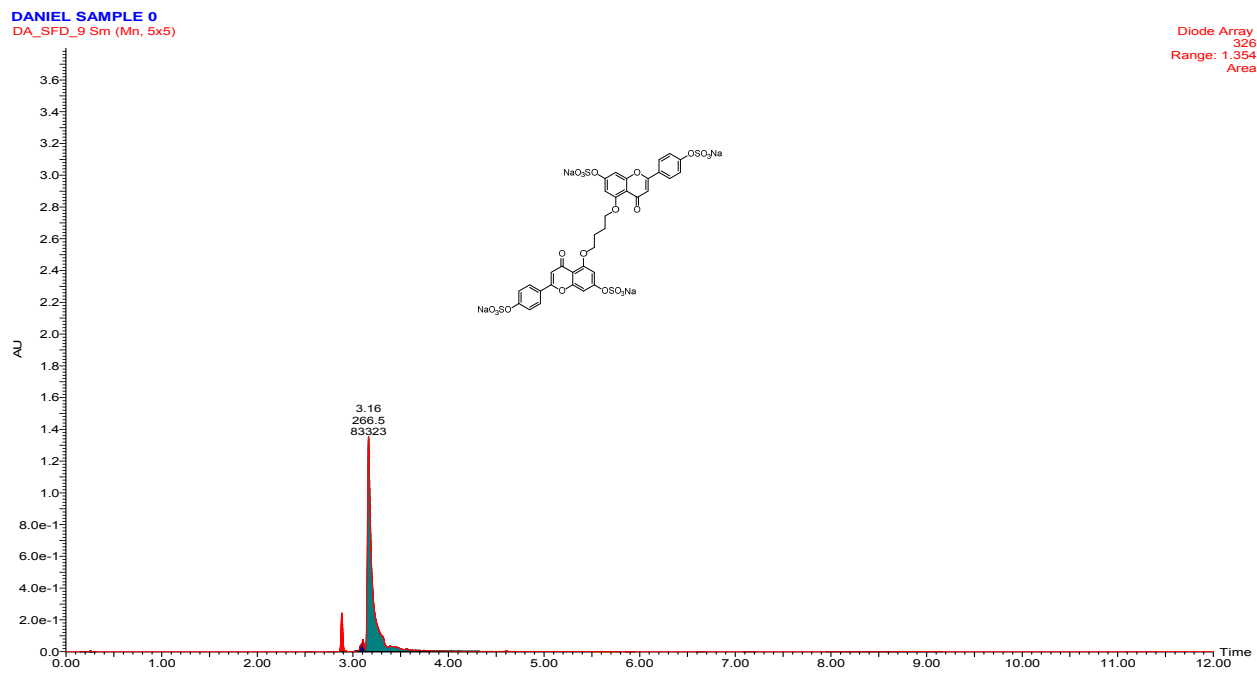

**Figure S8c: UPLC profile for NSGM 9**

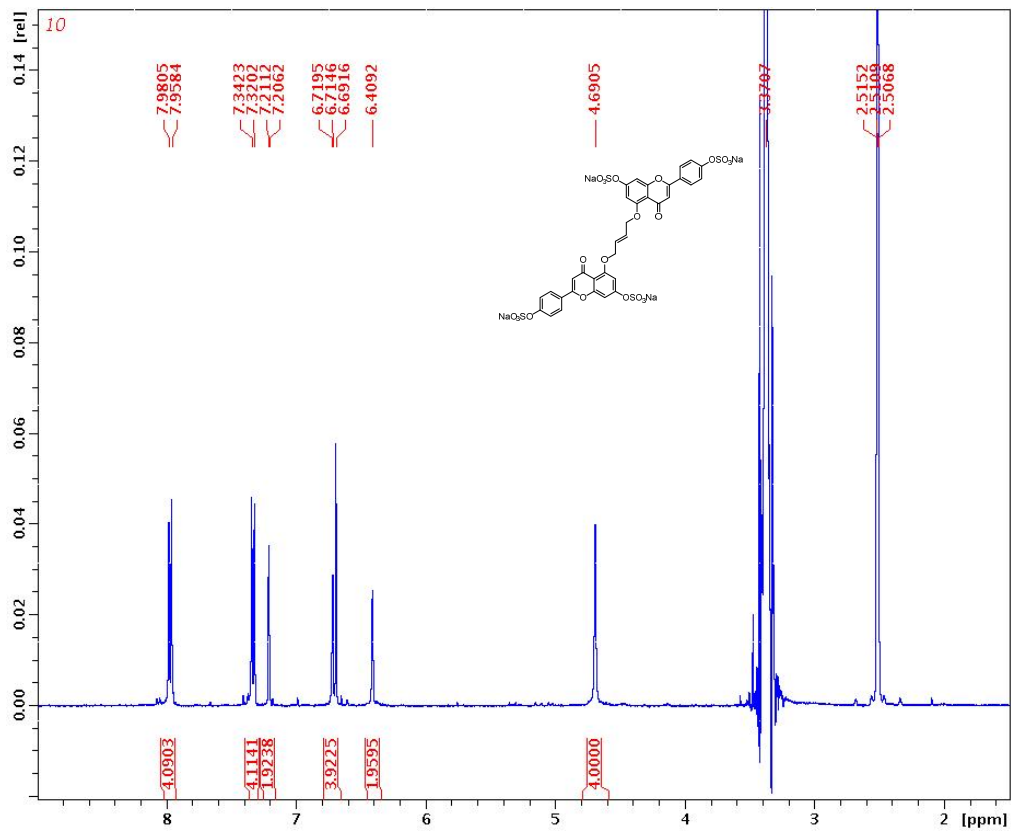

Figure S9a:  $^1\text{H}$  NMR (400 MHz, DMSO- $d_6$ ) for NSGM 10

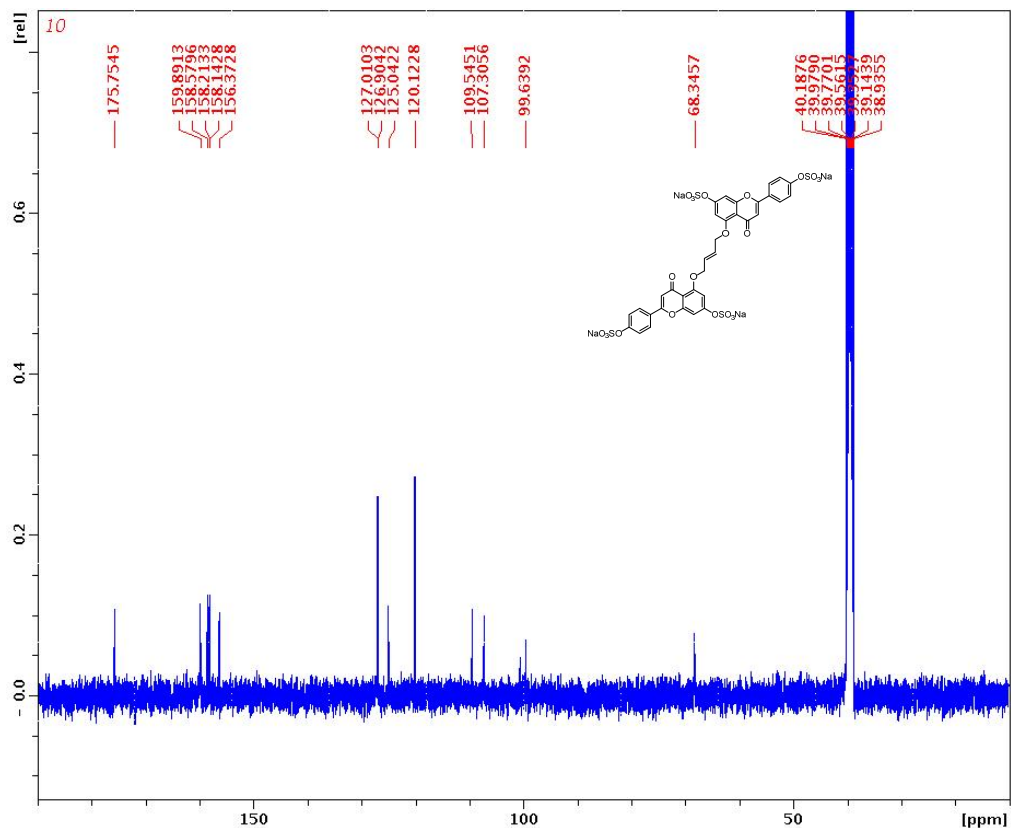

Figure S9b:  $^{13}\text{C}$  NMR (100 MHz, DMSO- $d_6$ ) for NSGM 10

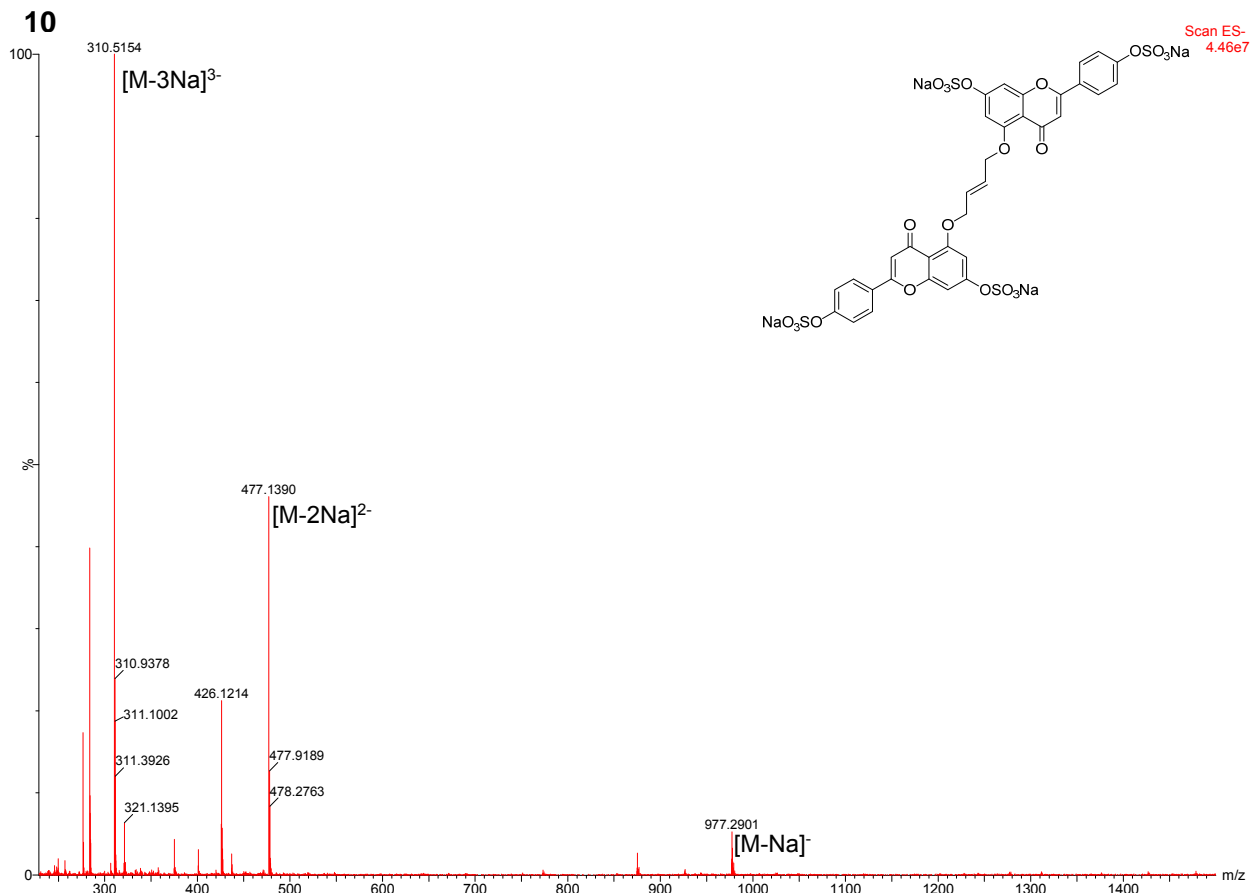

**Figure S9c: Mass Spectrum for NSGM 10**

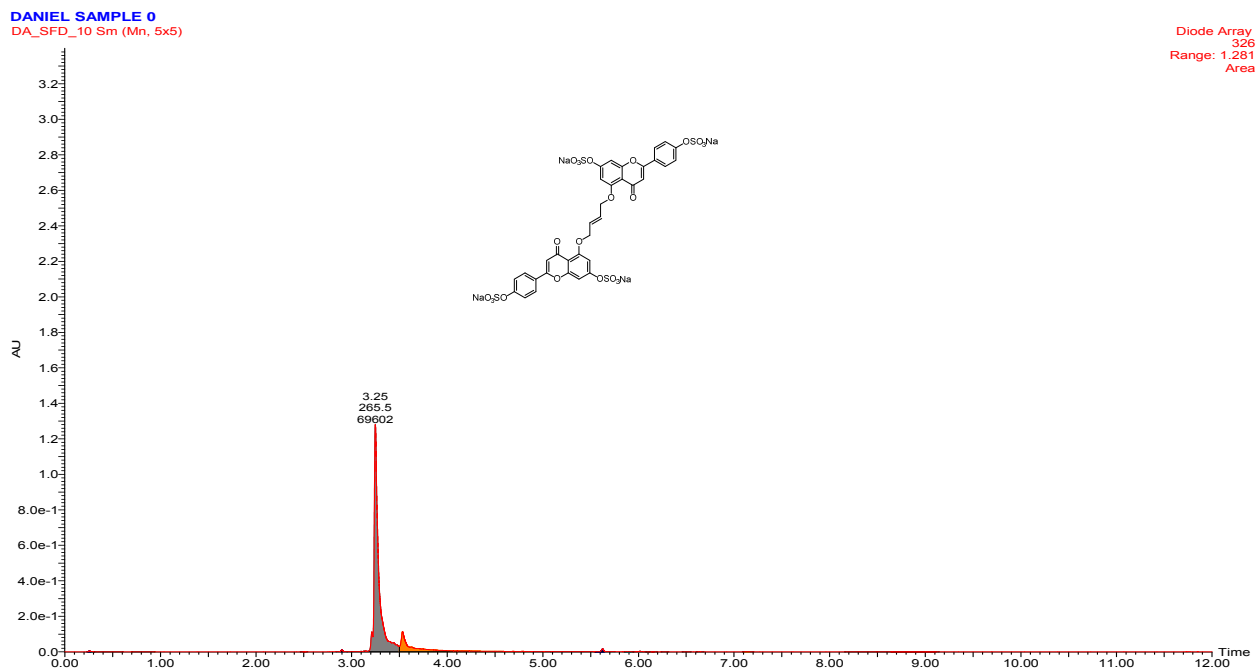

**Figure S9d: UPLC profile for NSGM 10**

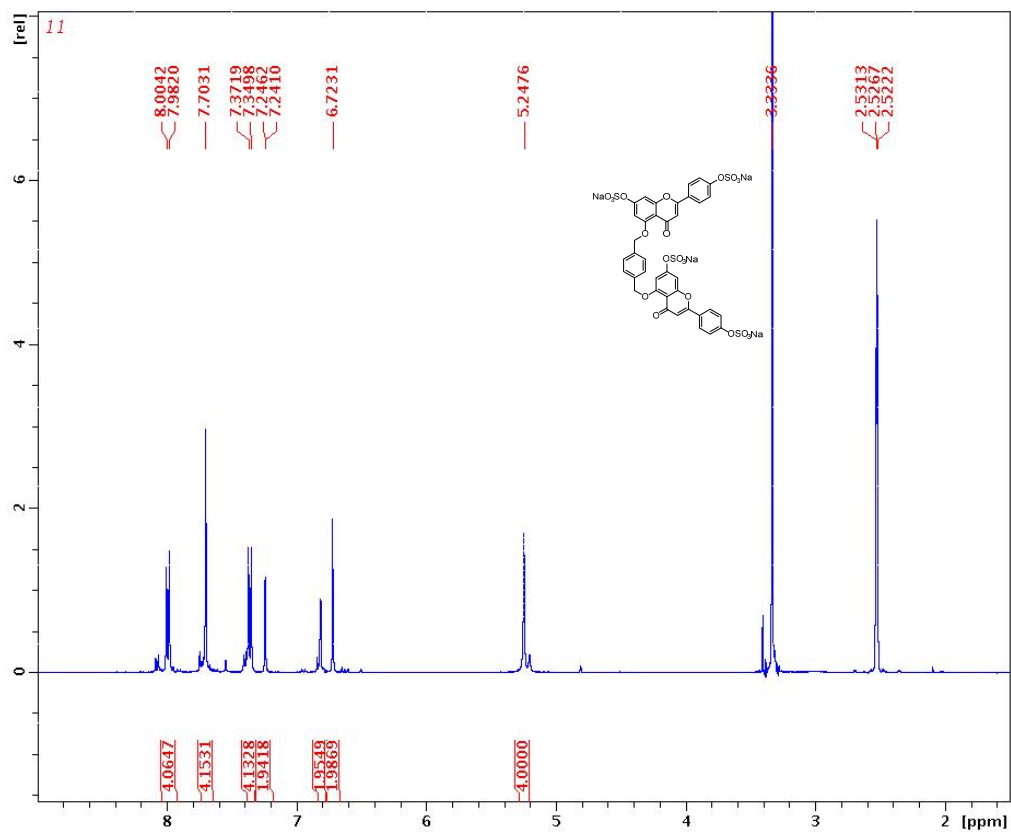

Figure S10a:  $^1\text{H}$  NMR (400 MHz, DMSO- $d_6$ ) for NSGM 11

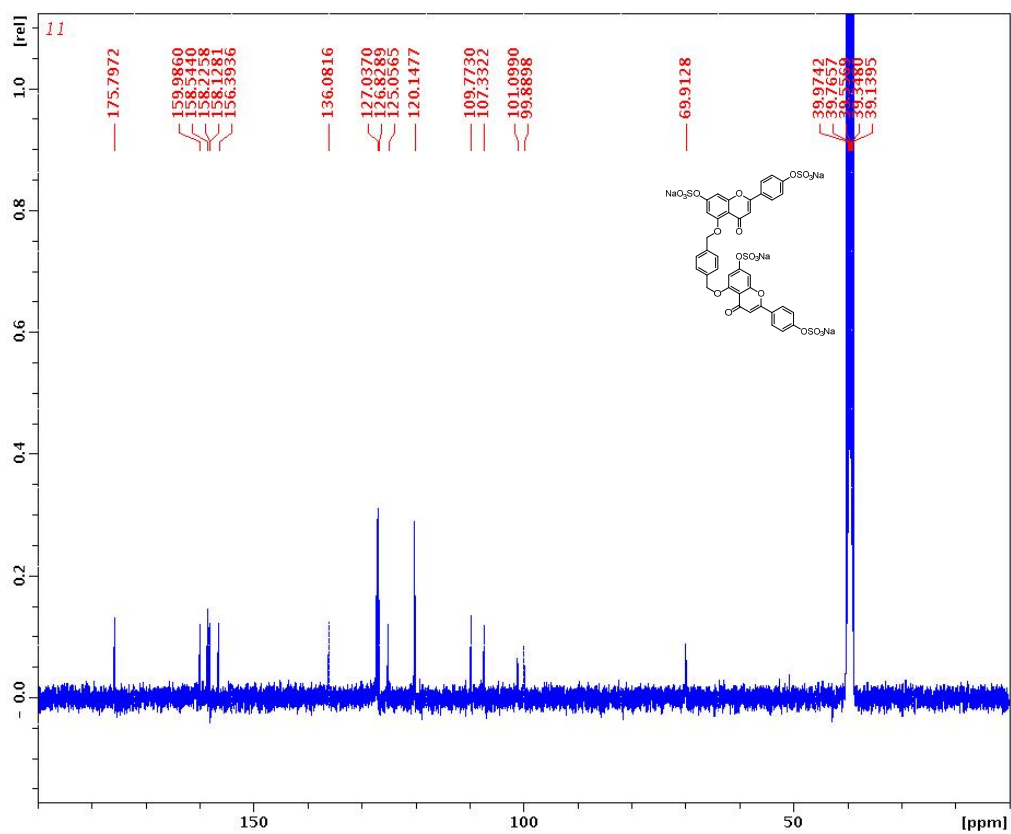

Figure S10b:  $^{13}\text{C}$  NMR (100 MHz, DMSO- $d_6$ ) for NSGM 11

11

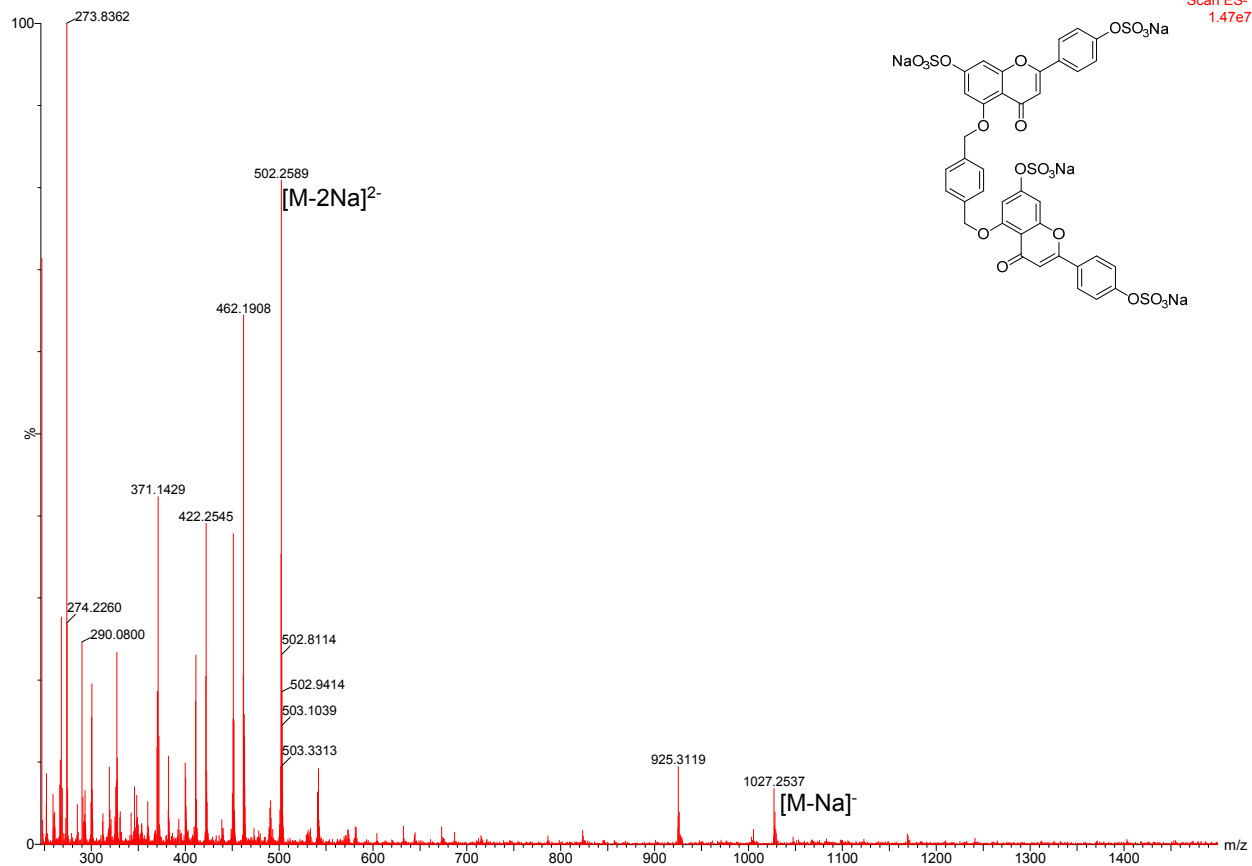

Figure S10c: Mass Spectrum for NSGM 11

DANIEL SAMPLE 0  
DA\_SFD\_11 Sm (Mn, 5x5)

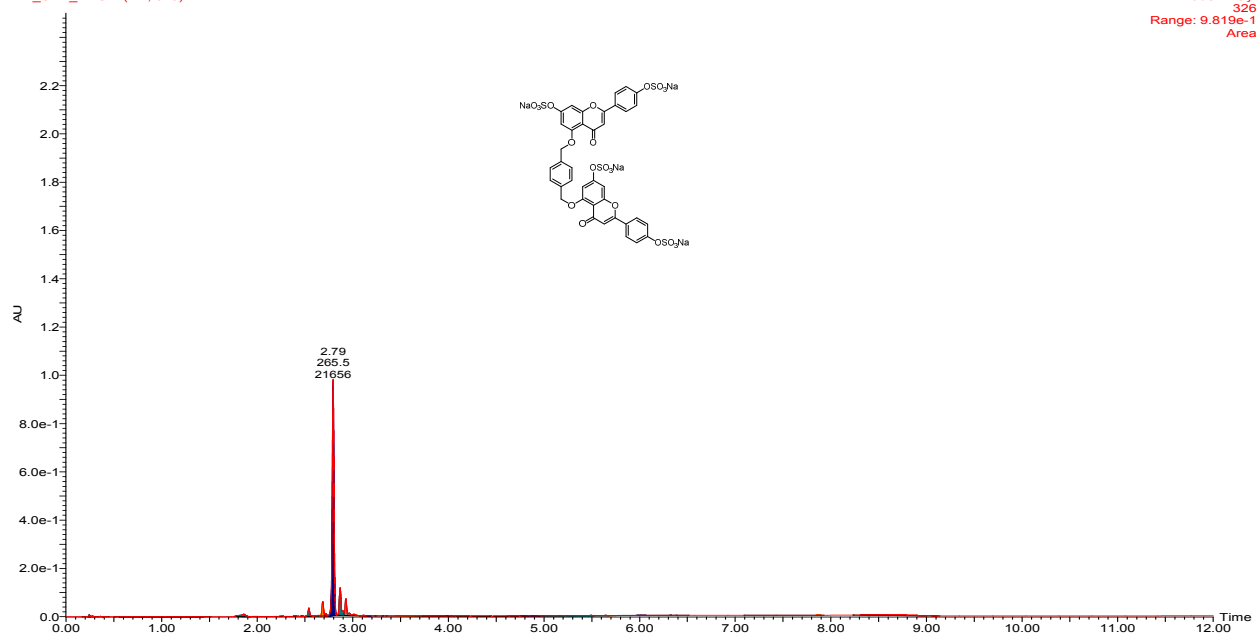

Figure S10d: UPLC profile for NSGM 11





12

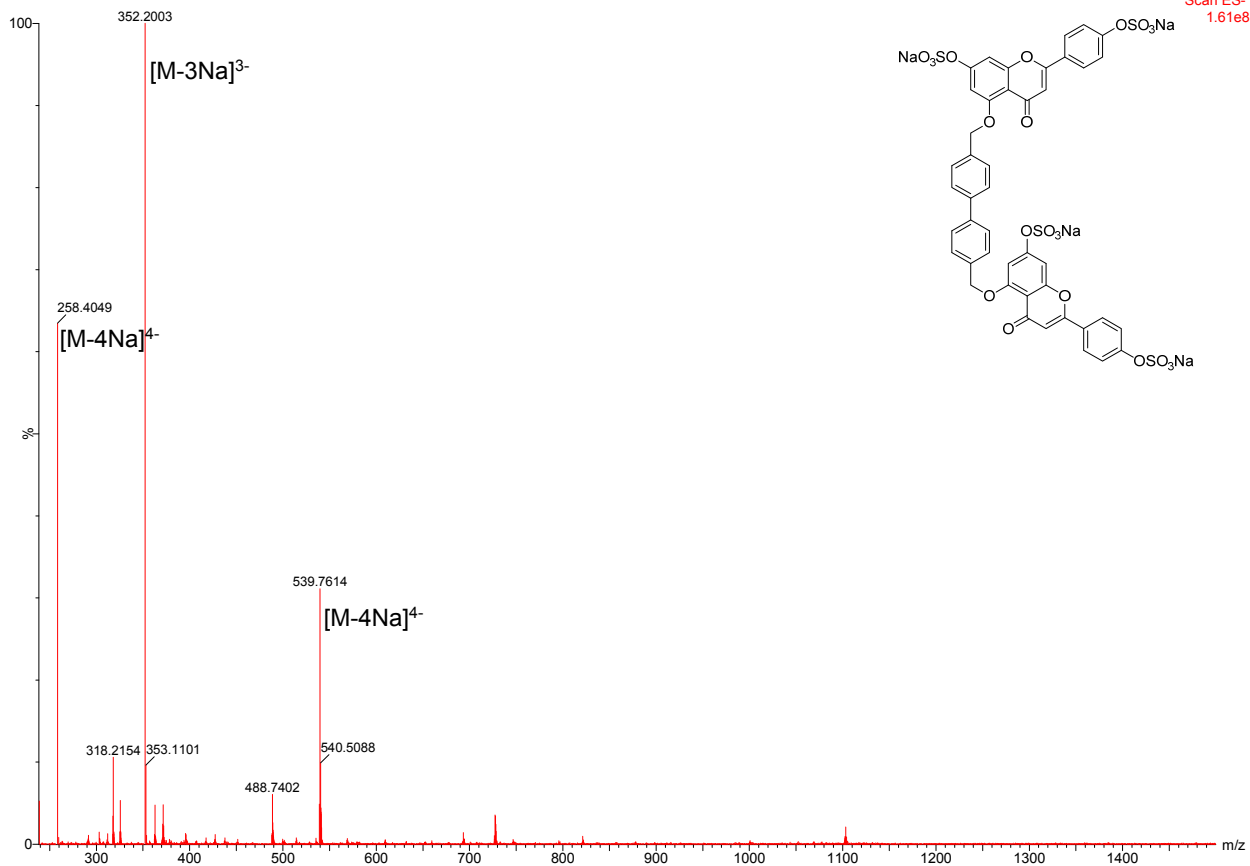

Figure S11c: UPLC profile for NSGM 12

DANIEL SAMPLE 0  
DA\_SFD\_12 Sm (Mn, 5x5)

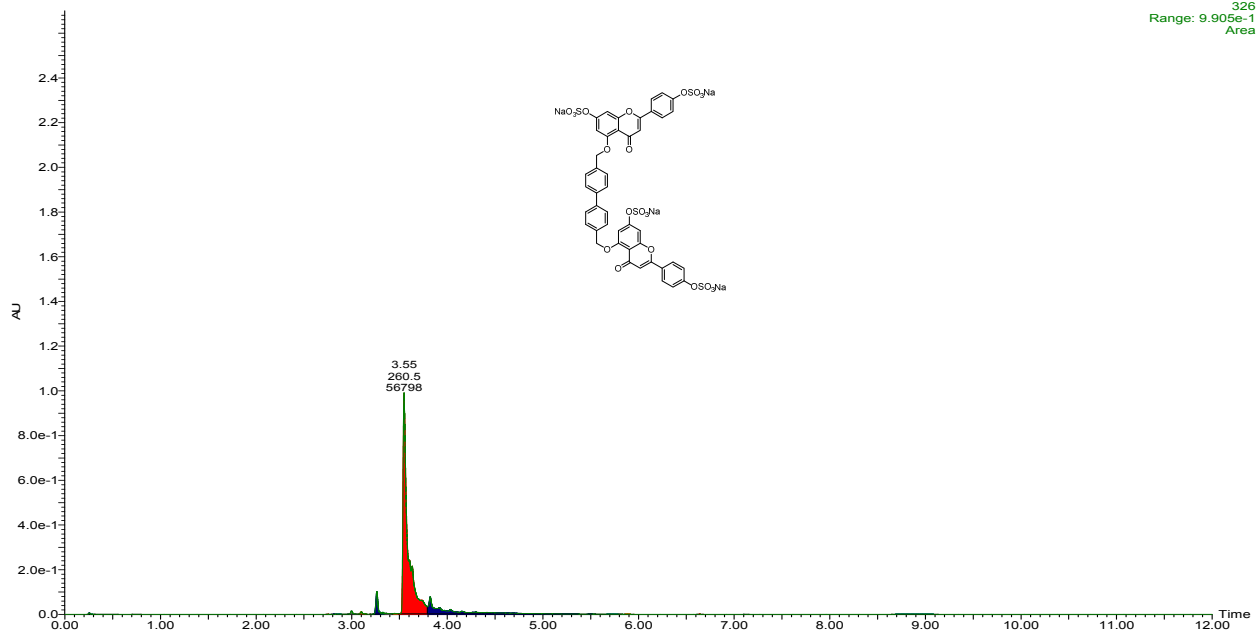

Figure S11d: Mass Spectrum for NSGM 12

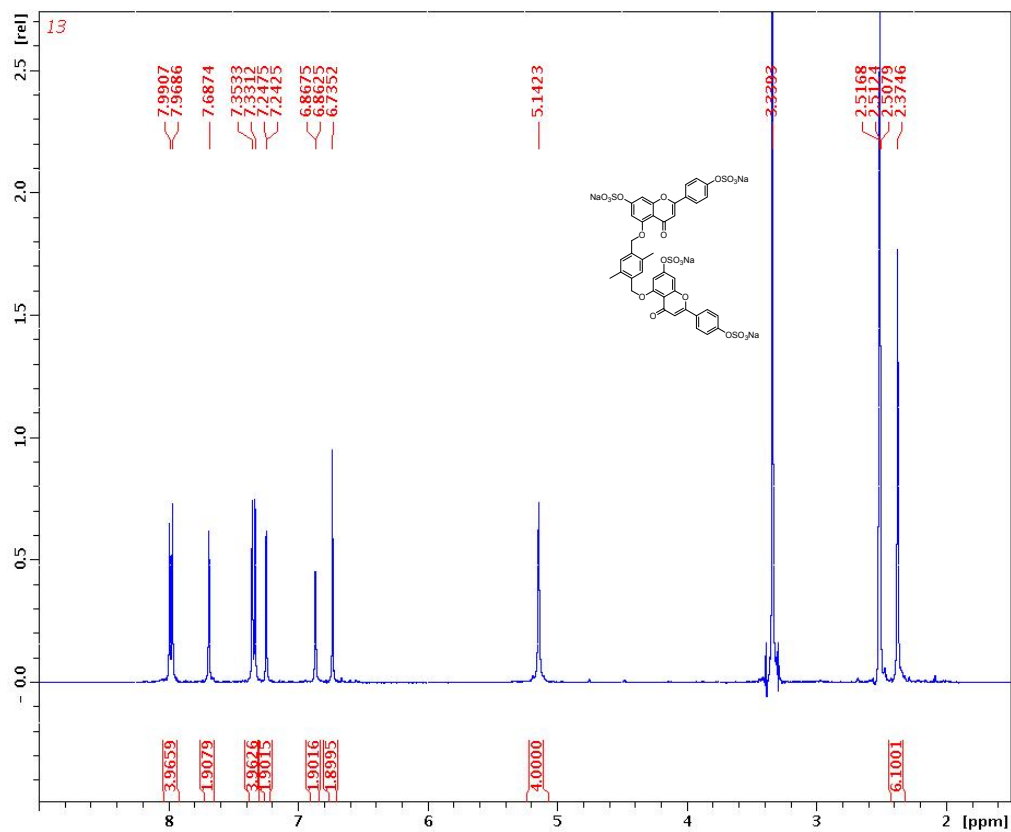

Figure S12a:  $^1\text{H}$  NMR (400 MHz, DMSO- $d_6$ ) for NSGM 13

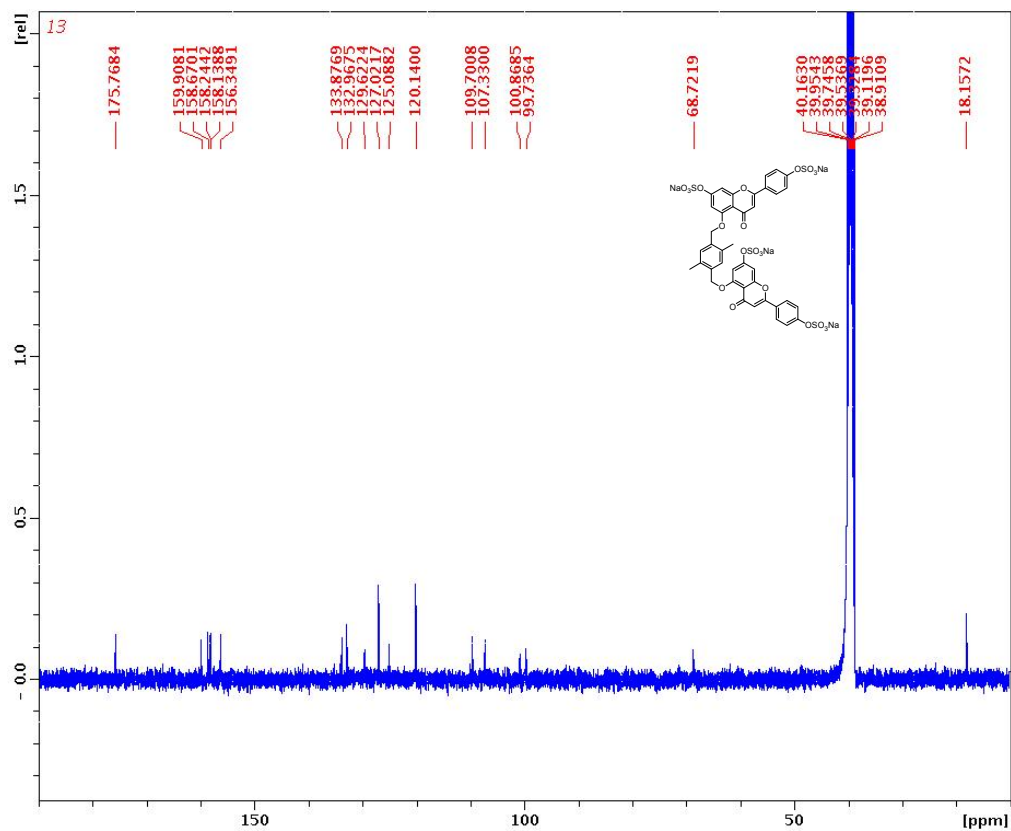

Figure S12b:  $^{13}\text{C}$  NMR (100 MHz, DMSO- $d_6$ ) for NSGM 13

13

Scan ES-  
8.06e7

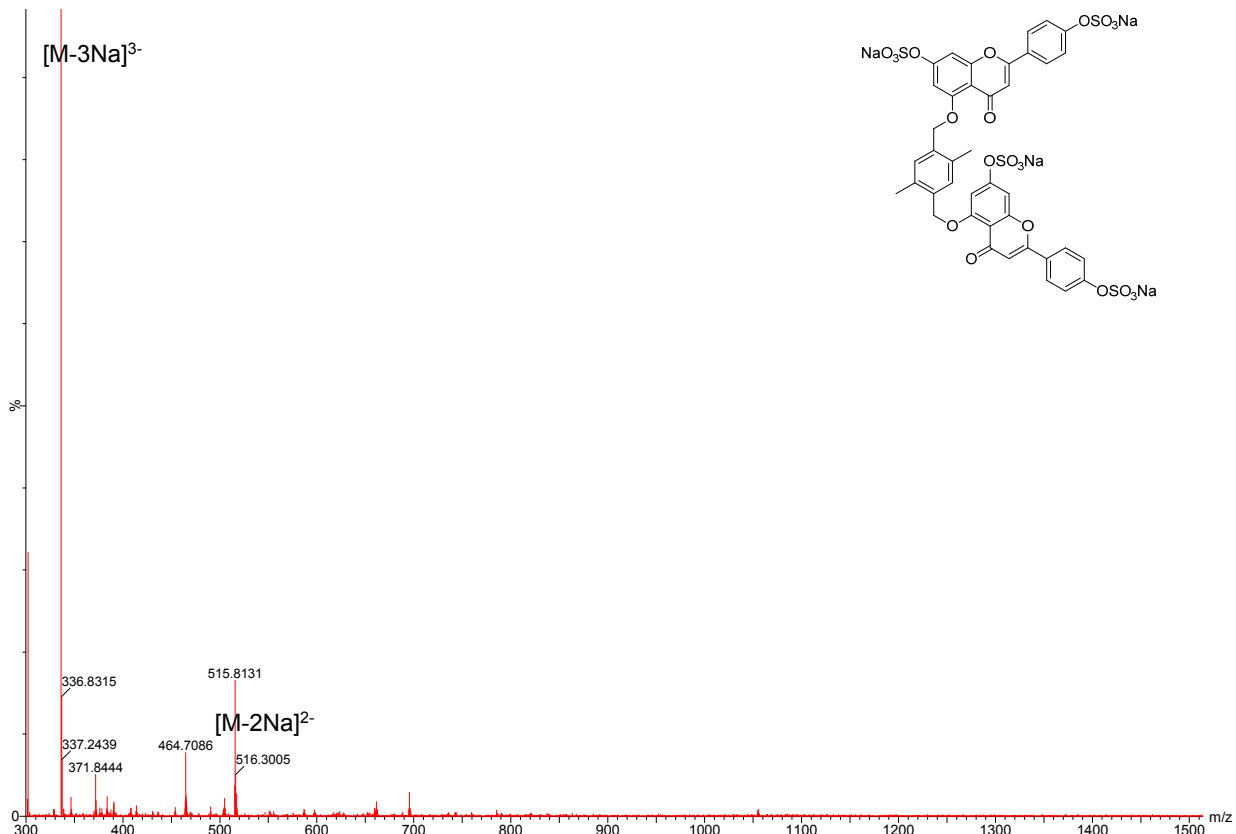

Figure S12c: Mass Spectrum for NSGM 13

DANIEL SAMPLE 0  
DA\_SFD\_13 Sm (Mn, 5x5)

Diode Array  
326  
Range: 1.397  
Area

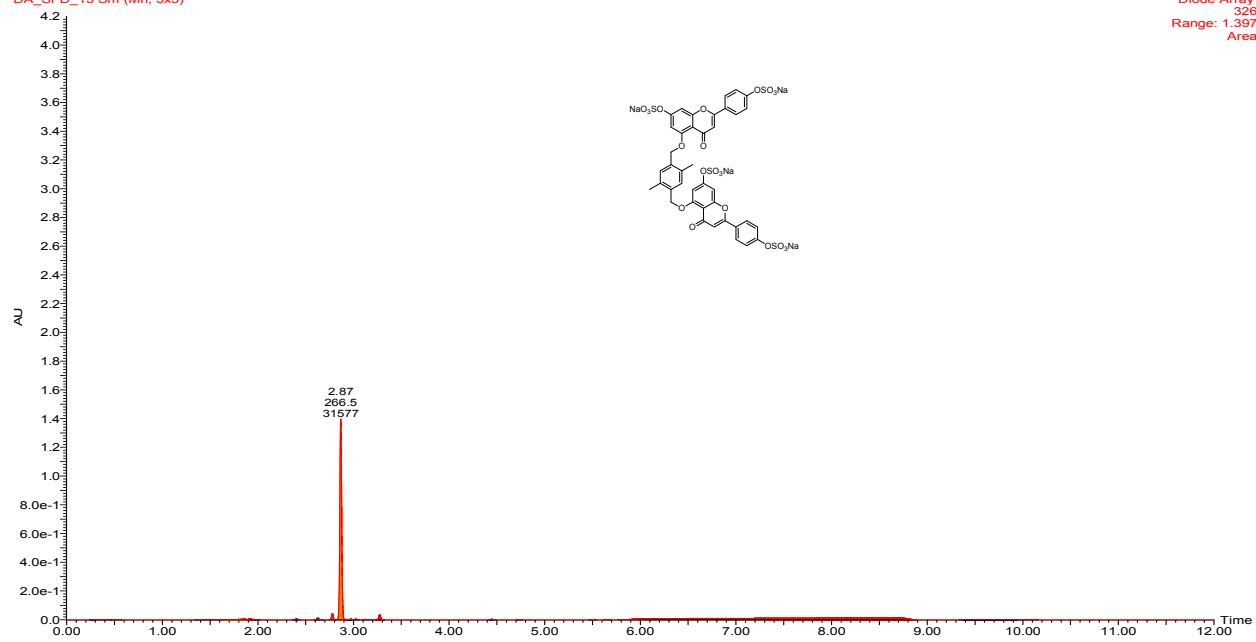

Figure S12d: UPLC profile for NSGM 13

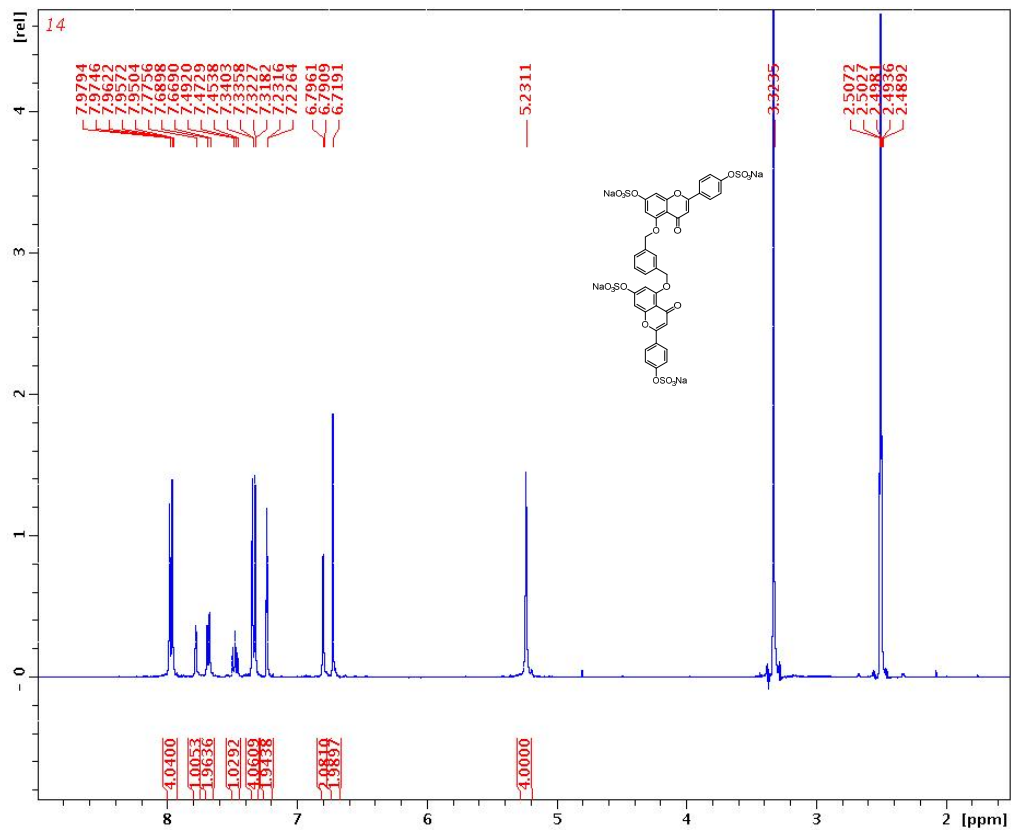

Figure S13a:  $^1\text{H}$  NMR (400 MHz, DMSO-d<sub>6</sub>) for NSGM 14

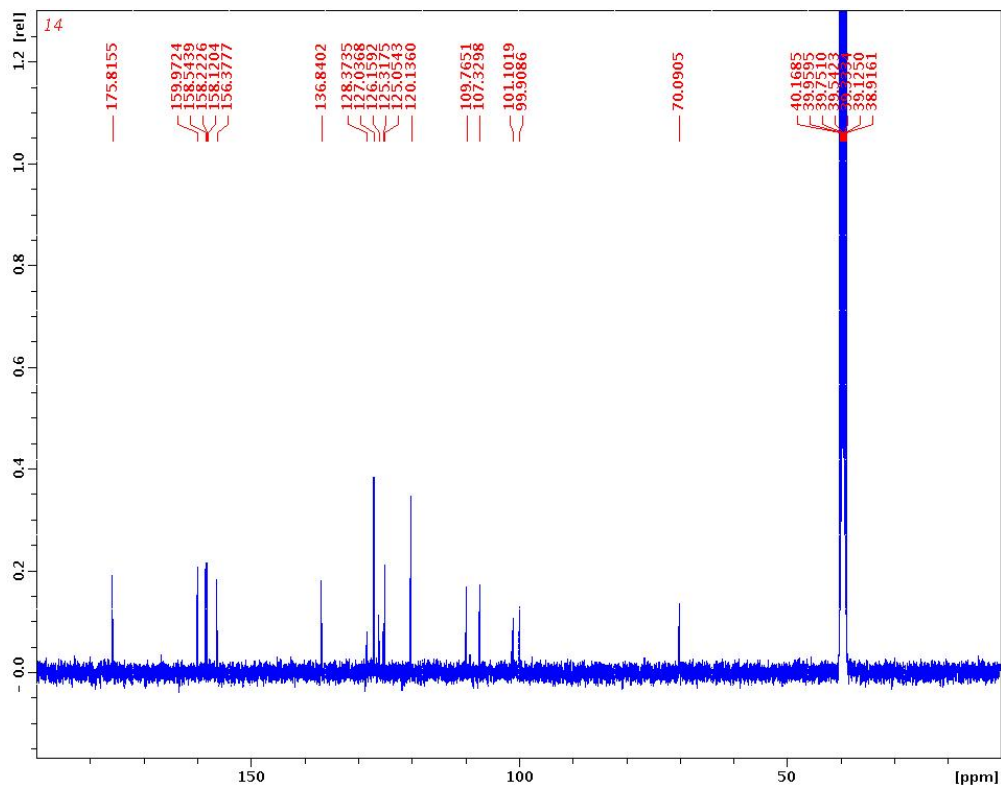

Figure S13b:  $^{13}\text{C}$  NMR (100 MHz, DMSO-d<sub>6</sub>) for NSGM 14



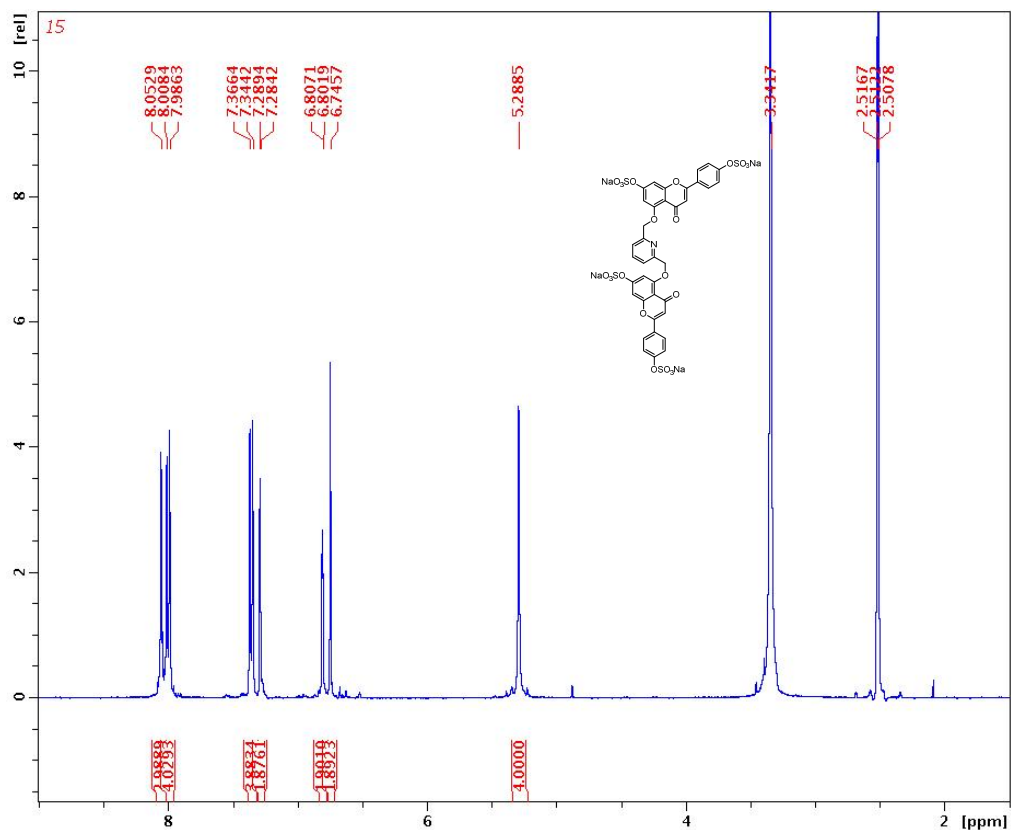

Figure S14a:  $^1\text{H}$  NMR (400 MHz, DMSO- $d_6$ ) for NSGM 15

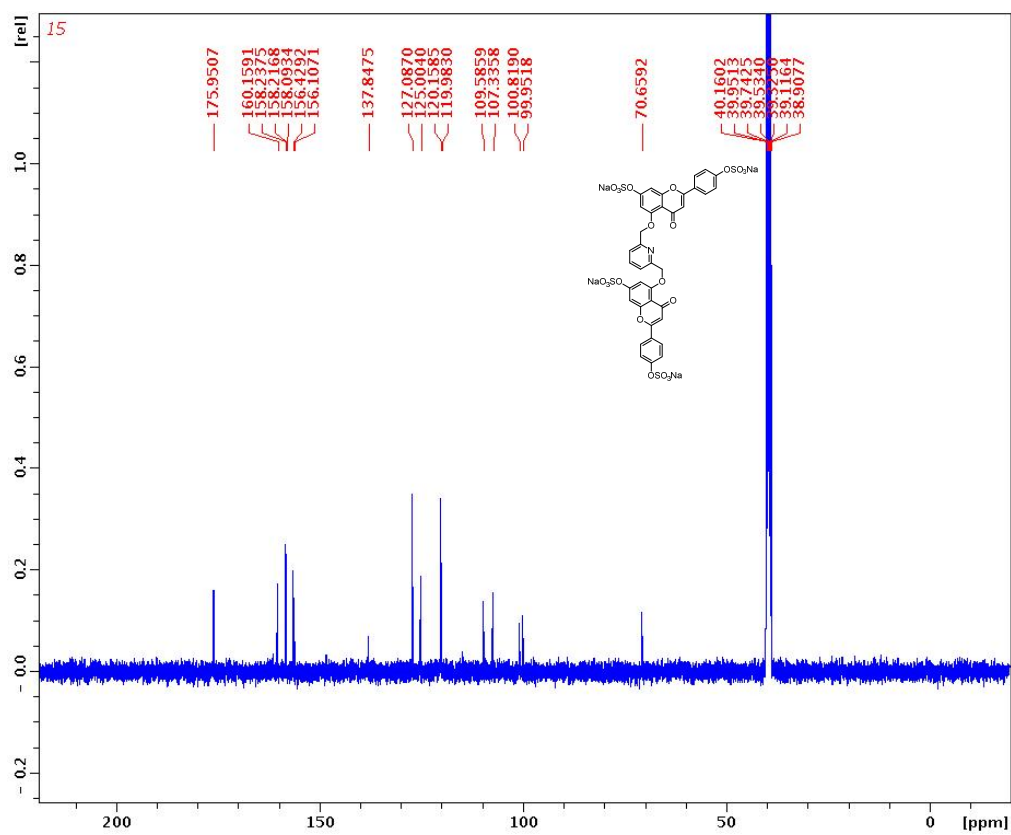

Figure S14b:  $^{13}\text{C}$  NMR (100 MHz, DMSO- $d_6$ ) for NSGM 15

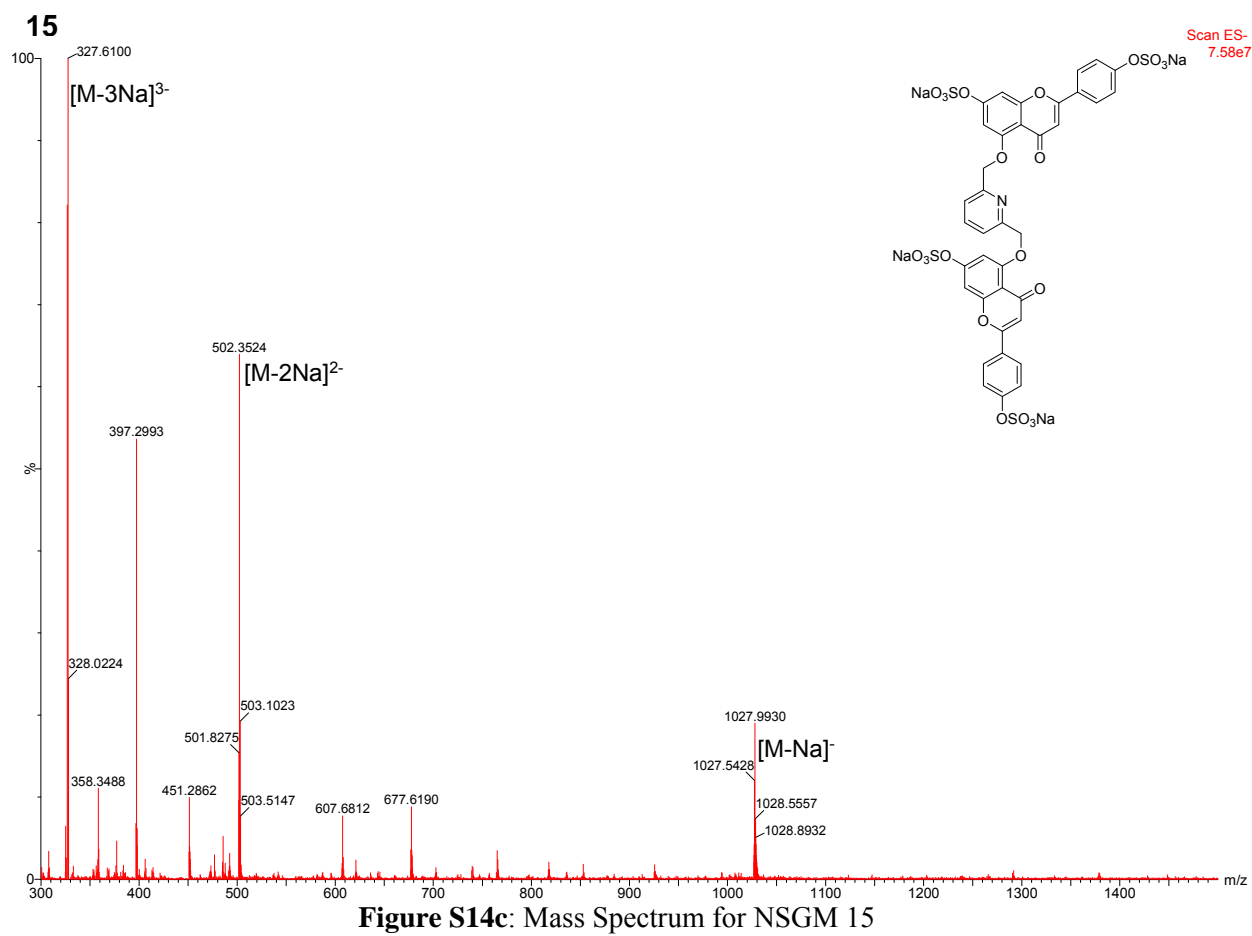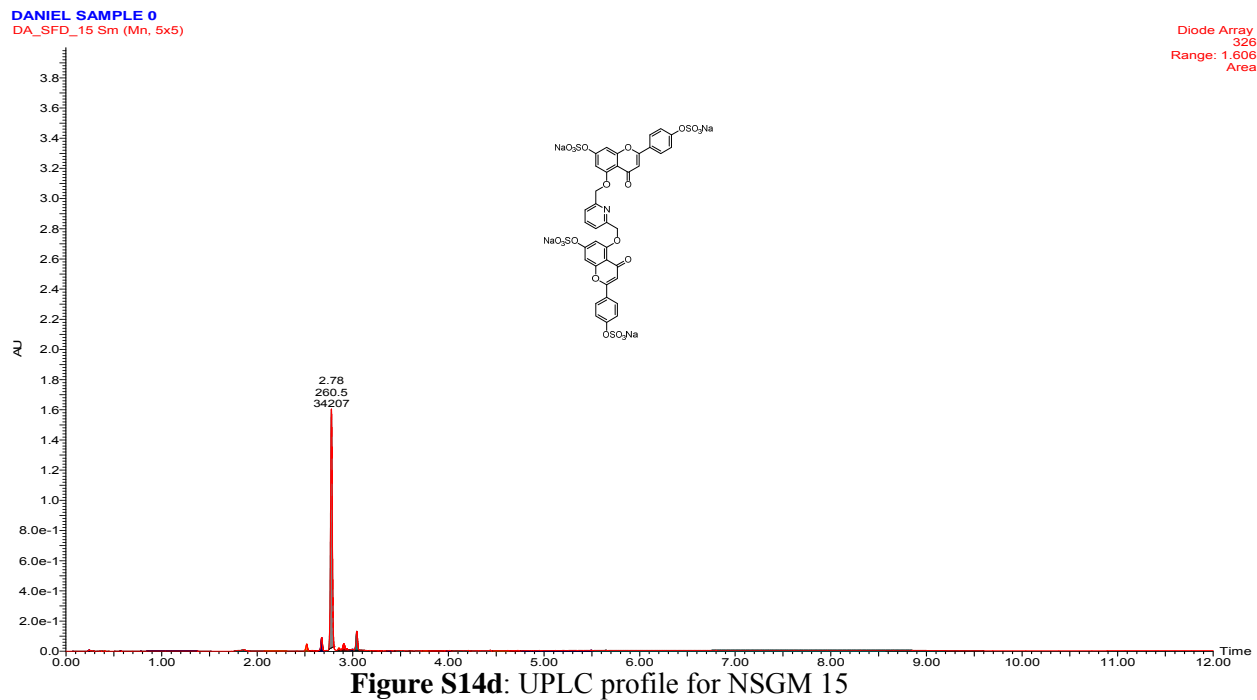

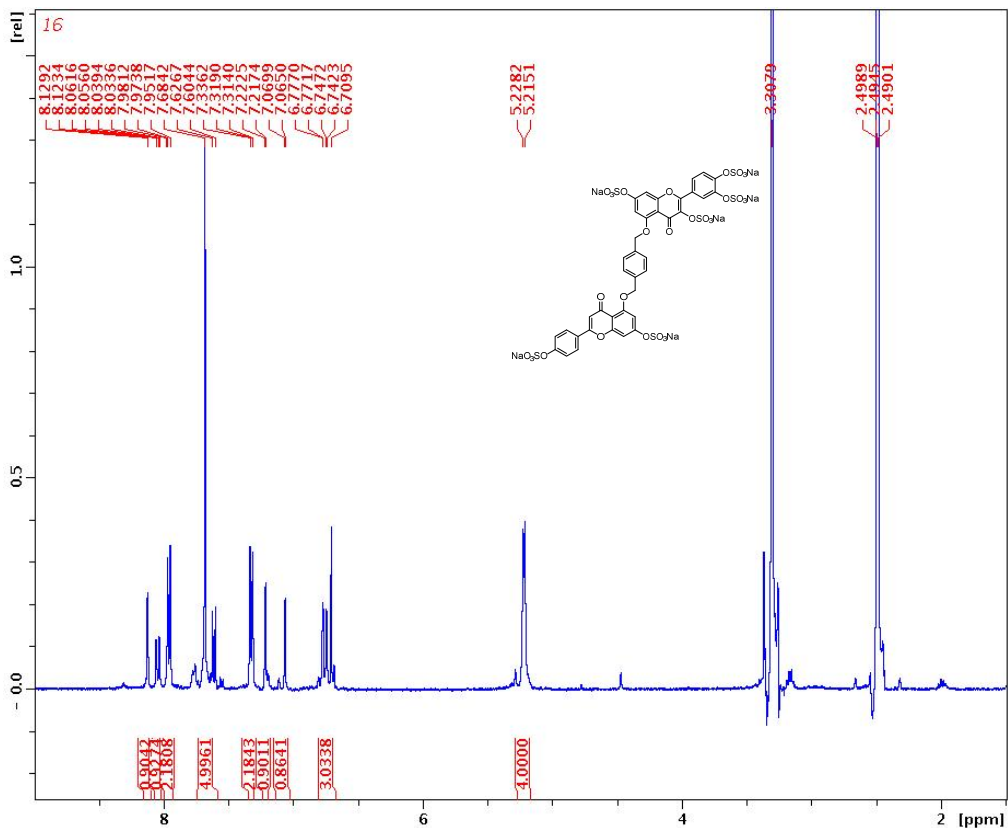

Figure S15a: <sup>1</sup>H NMR (400 MHz, DMSO-d<sub>6</sub>) for NSGM 16

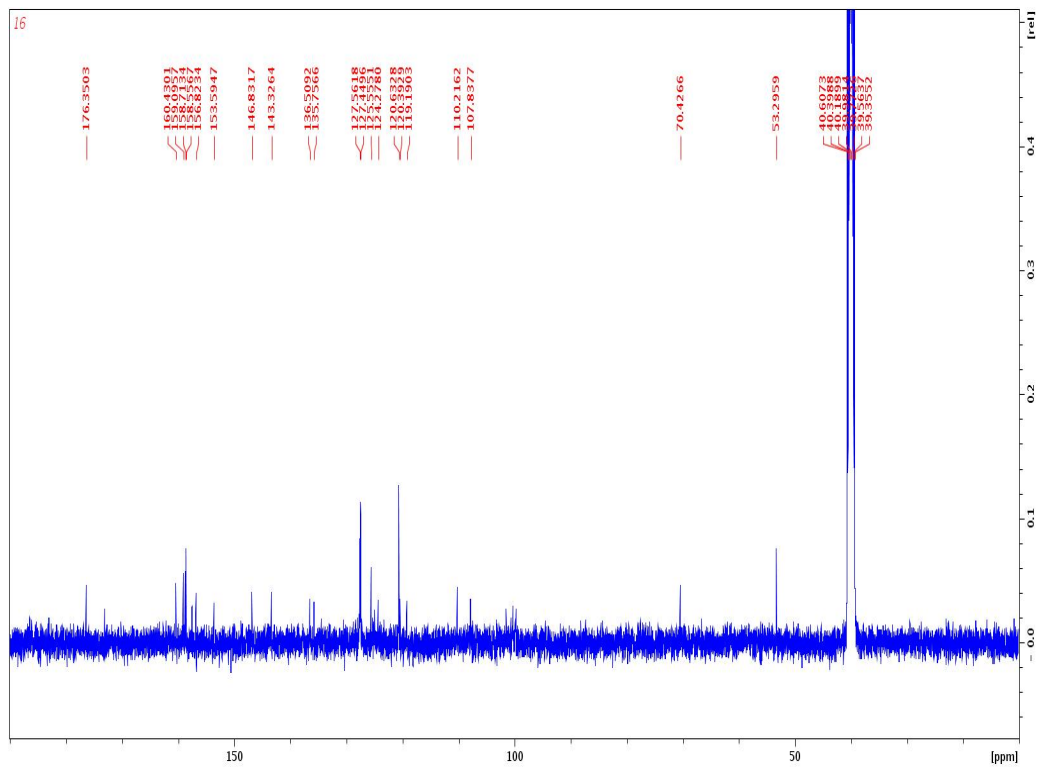

Figure S15a: <sup>13</sup>C NMR (100 MHz, DMSO-d<sub>6</sub>) for NSGM 16



16

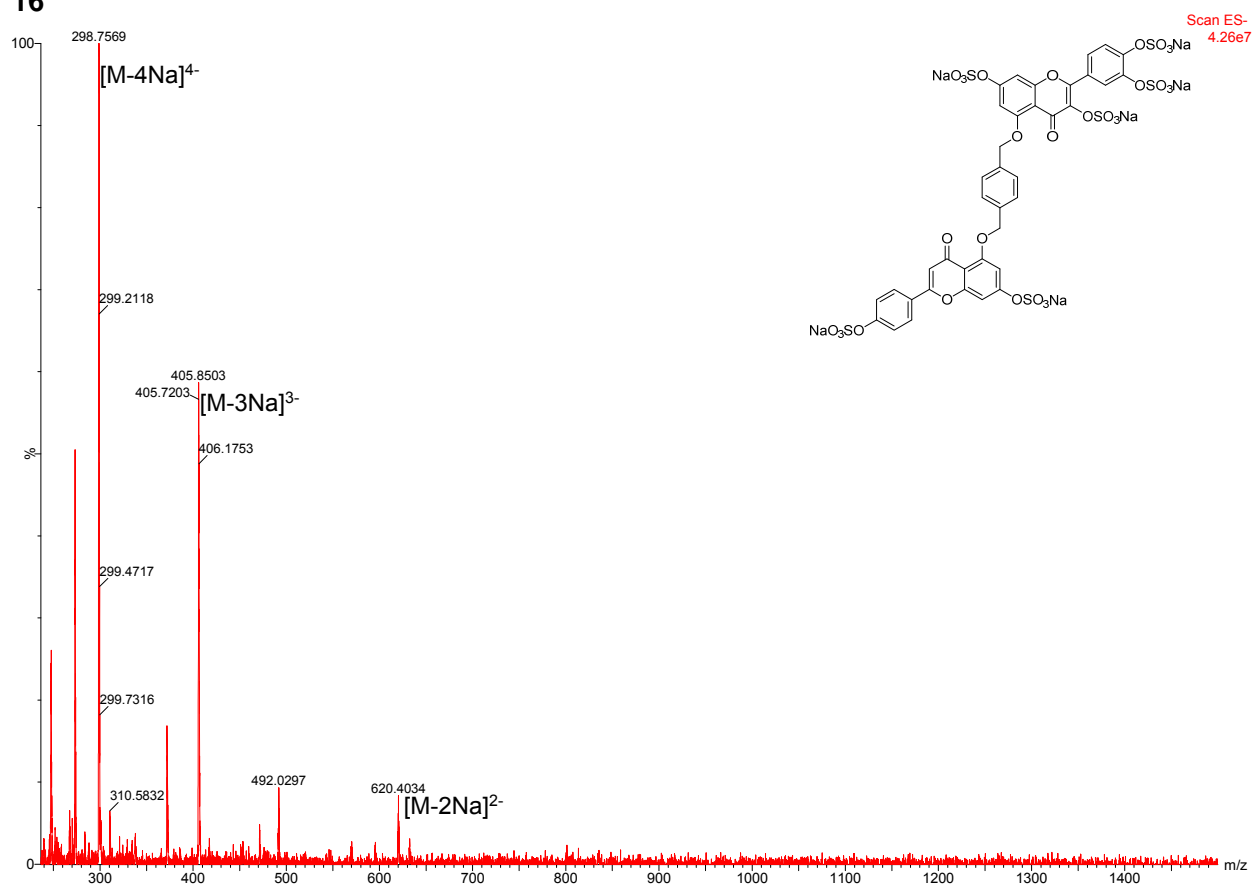

Figure S15c: Mass Spectrum for NSGM 16

### **PAINS Evaluation**

1. The compounds reported in this manuscript are not documented as pan assay interference compounds (PAINS).
2. In multiple chromogenic substrate assay employed to measure inhibition potencies using several log fold range in concentrations, no interference was detected with substrate or other excipients.
3. The compounds themselves are off-white or yellowish in color and therefore do not generate color interference.
4. None of the compounds possess a reactive functional group. The compounds do not react covalently with plasmin or with any of the homologous enzymes studied herein. This is also supported by the fact that reversal of inhibition can be effected with protamine sulfate. This reversal is complete (100%).
5. Finally, no aggregation of compounds in water was observable in the range of concentrations studied (nM to ~500  $\mu$ M). All compounds studied are highly water soluble and not known to aggregate in water. Further, the assay buffer used for studying inhibition contained 0.02% Tween80, which is a surfactant that limits induction of aggregation.
